# 1 **BRD9-containing non-canonical BAF complexes safeguard cell identity and** 2 **prevent reprogramming**

3 Kenan Sevinç<sup>1,7</sup>, Gülben Gürhan Sevinç<sup>1,7</sup>, Ayşe Derya Cavga<sup>1,2</sup>, Martin Philpott<sup>3</sup>, Simge  
4 Kelekçi<sup>1</sup>, Hazal Can<sup>1</sup>, Adam P. Cribbs<sup>3</sup>, Enes Sefa Ayar<sup>1</sup>, Dilşad H. Arabacı<sup>1</sup>, James E.  
5 Dunford<sup>3</sup>, Ata B. Demir<sup>1</sup>, Logan H. Sigua<sup>4</sup>, Jun Qi<sup>4</sup>, Udo Opper mann<sup>3,5,6,8</sup>, Tamer T. Onder<sup>1,8,\*</sup>

6  
7 <sup>1</sup> School of Medicine, Koç University, Istanbul, Turkey.

8 <sup>2</sup> Biostatistics, Bioinformatics and Data Management Core, KUTTAM, Koç University, Istanbul,  
9 Turkey.

10 <sup>3</sup> Botnar Research Centre, Oxford NIHR BRU, University of Oxford, Oxford, UK.

11 <sup>4</sup> Department of Cancer Biology, Dana Farber Cancer Institute, Boston, MA, USA.

12 <sup>5</sup> Centre for Medicine Discovery, University of Oxford, Oxford, UK.

13 <sup>6</sup> Oxford Centre for Translational Myeloma Research, University of Oxford, OX3 7LD, UK

14 <sup>7</sup> These authors contributed equally.

15 <sup>8</sup> These authors contributed equally.

16 \* Correspondence: [tonder@ku.edu.tr](mailto:tonder@ku.edu.tr)

17

## 18 **Abstract**

19 Epigenetic reprogramming requires extensive remodeling of chromatin landscapes to  
20 silence cell-type specific gene expression programs. ATP-dependent chromatin-remodeling  
21 complexes are important regulators of chromatin structure and gene expression; however, the role  
22 of Bromodomain-containing protein 9 (BRD9) and the associated ncBAF (non-canonical BRG1-  
23 associated factors) complex in reprogramming remains unknown. Here, we show that genetic  
24 suppression of BRD9 as well as ncBAF complex subunit GLTSCR1, but not the closely related  
25 BRD7, increase the efficiency by which induced pluripotent stem cells (iPSCs) can be generated  
26 from human somatic cells. Chemical inhibition and acute degradation of BRD9 phenocopied this  
27 effect. Interestingly, we find that BRD9 is dispensable for establishment and maintenance of

28 human pluripotency but required for mesendodermal lineage commitment during differentiation.  
29 Mechanistically, BRD9 inhibition downregulates somatic cell type-specific genes and decreases  
30 chromatin accessibility at somatic enhancers. Collectively, these results establish BRD9 as an  
31 important safeguarding factor for somatic cell identity whose inhibition lowers chromatin-based  
32 barriers to reprogramming.

33

## 34 **Introduction**

35

36 Expression of transcription factors (TFs) such as Oct4, Sox2, Klf4, c-Myc (OSKM) can  
37 erase somatic cell identity and reprogram the cells to a pluripotent state (1, 2). In doing so,  
38 reprogramming factors reset the entire epigenetic landscape established throughout development  
39 (3). The varying and low efficiencies of this process point to the presence of intrinsic somatic  
40 barriers to cell fate conversions. Several chromatin factors such as DOT1L methyltransferase (4),  
41 histone chaperone CAF-1 (5), BET family proteins (6), RNA Pol II regulator RPAP1 (7), SUMO  
42 modification (8), chromatin regulator FACT (9) and CBP/EP300 bromodomains (10) have  
43 emerged as potent barriers to reprogramming and act mainly by safeguarding pre-existing gene  
44 expression programs. Inhibition of these factors greatly facilitate reprogramming of a wide range  
45 of cell types (11). Discovery of additional safeguarding factors will likely yield important insights  
46 into chromatin-based mechanisms that maintain cell identity and restrict cell plasticity.

47 ATP-dependent chromatin remodeling complexes evict, exchange and space nucleosomes  
48 driven by the hydrolysis of ATP (12). Chromatin remodelers can facilitate transcriptional  
49 activation or repression based on the genomic location they bind to and additional chromatin  
50 factors they recruit (13–15). Among these, NuRD, INO80 and SWI/SNF complexes have been

51 shown to modulate reprogramming in a variety of contexts (16–19). For example, overexpression  
52 of BAF complex subunits Smarca4 and Smarcc1 enhances murine somatic cell reprogramming by  
53 facilitating binding of Oct4 to its gene targets (18). In contrast, BAF complex subunits, Smarca2  
54 and Smarcc2, have shown to be barriers in this context through upregulation of Stat3 and its target  
55 genes (20). Suppressing these somatic BAF subunits have been shown to activate the pluripotency  
56 circuit (20). These studies point to regulatory roles for different ATP-dependent chromatin  
57 remodeling complexes in various reprogramming frameworks.

58 Non-canonical BAF (ncBAF) complex is a recently identified SWI/SNF complex that lacks  
59 SMARCE, SMARCB, ARID1 and DPF but includes specific subunits such as BRD9 and  
60 GLTSCR1/L (21–25). BRD9 binds to enhancer regions in a cell type-specific manner and  
61 inhibition of its bromodomain leads to apoptosis in acute myeloid leukemia cells (26). Similarly,  
62 BRD9 inhibition leads to decreased cell proliferation, G1-arrest and apoptosis in rhabdoid tumor  
63 cells (24). In mouse embryonic stem cells (mESCs), ncBAF has been shown to co-localize with  
64 key regulators of naive pluripotency and BRD9 bromodomain inhibitors abolish naïve  
65 pluripotency by disrupting ncBAF’s recruitment to chromatin (27). These studies suggest that  
66 BRD9 is important for regulating cell identity and survival. However, the role of BRD9 and the  
67 ncBAF complex in somatic cell reprogramming remains unknown. In this study, we addressed this  
68 question using a combination of chemical and genetic tools in somatic cells and revealed an  
69 important role for BRD9 in safeguarding cell identity in the context of human reprogramming.

## 70 **Results**

71

### 72 **Genetic suppression of ncBAF-specific subunits increases reprogramming efficiency**

73 To investigate the role of ncBAF complex in reprogramming, we employed two genetic  
74 loss-of-function approaches. First, knockdown of *BRD9* using 2 independent shRNAs increased  
75 reprogramming efficiency 2-fold (fig. S1, A and B). On the other hand, suppression of *BRD9*  
76 paralog and PBAF-specific subunit, *BRD7*, had no effect on reprogramming even though it was  
77 efficiently knocked-down (fig. S1, A and C). In the second approach, we utilized sgRNAs and  
78 Cas9 to knock-out *BRD9* and then test the reprogramming efficiency of the resulting cells.  
79 Consistent with the shRNA data, knock-out of *BRD9*, but not *BRD7*, boosted reprogramming  
80 efficiency up to 3-fold compared to control sgRNA expression (Fig. 1, A, B and C). Based on these  
81 results, we hypothesized that among the various BAF complexes in somatic cells, BRD9-  
82 containing ncBAF complex is a specific barrier for reprogramming. To test this notion, additional  
83 ncBAF specific subunits Glioma tumor suppressor candidate region gene 1 (*GLTSCR1*) or its  
84 paralog *GLTSCR1-like* (*GLTSCR1L*) were targeted by sgRNAs in human fibroblasts (21).  
85 Knocking out *GLTSCR1* increased reprogramming efficiency up to 4-fold for 3 sgRNAs out of 4  
86 tested compared to control sgRNA expression (Fig. 1D). Targeting *GLTSCR1* paralog,  
87 *GLTSCR1L*, had no effect on reprogramming even though T7 endonuclease assay confirmed indel  
88 formation at this locus (Fig. 1D and fig. S1D). These results show that ncBAF complex members  
89 act as barriers to human somatic cell reprogramming.

## 90 **Bromodomain inhibition and degradation of BRD9 facilitate reprogramming**

91 To confirm the role of BRD9 in somatic cell reprogramming, we next employed 3  
92 structurally different inhibitors LP99, BI-7273 and I-BRD9 all of which selectively target the  
93 bromodomain of BRD9 and block its interaction with acetylated lysines (28–30) (Fig. 2A). All  
94 three BRD9 bromodomain inhibitors significantly increased reprogramming efficiency of human

95 fibroblasts to iPSCs up to two-fold at concentrations of 1 and 3  $\mu$ M (Fig. 2B). Importantly, I-BRD9  
96 treatment had an additive effect with the inhibition of DOT1L, a potent reprogramming enhancer  
97 that we had previously identified (4). Combined inhibition of BRD9 and DOT1L led to a  
98 remarkable 5-fold increase in the number of iPSCs generated from human fibroblasts (fig. S2A).  
99 Emerging iPSC colonies in both control and BRD9 bromodomain inhibitor-treated cultures  
100 exhibited canonical characteristics of pluripotency such as retroviral transgene silencing and  
101 expression of pluripotency-specific markers OCT4, SSEA4 and NANOG (fig. S2, B and C). When  
102 injected into immunodeficient mice, iPSCs derived from I-BRD9-treated fibroblasts were able to  
103 form teratomas containing differentiated cells from all three germ layers (fig. S2D). These results  
104 show that inhibition of BRD9 bromodomain enhances human somatic cell reprogramming.

105         Next, we took advantage of a recently described PROteolysis Targeting Chimera  
106 (PROTAC) targeting BRD9, dBRD9, to acutely deplete this protein (31). Time-course  
107 experiments showed that treatment with dBRD9 can dramatically decrease BRD9 protein levels  
108 for up to 72 hours without any effects on the closely related BRD7 (Fig. 2C). We observed that  
109 reprogramming efficiency increased up to 2-fold compared to control treatment even at the lowest  
110 concentration of 0.1  $\mu$ M dBRD9 tested (Fig. 2D). A similar phenotype was observed in episomal  
111 plasmid-based reprogramming of an additional human dermal fibroblast line, indicating that BRD9  
112 inhibition enhances iPSC generation independent of reprogramming strategy or cell line used (fig.  
113 S2E). Taken together, these results show that bromodomain inhibition or acute degradation of  
114 BRD9 increases human somatic cell reprogramming efficiency.

115         To understand how BRD9 inhibition promotes iPSC generation, we first determined when  
116 in the reprogramming process its inhibition has the maximal effect. A time-course treatment

117 experiment with I-BRD9, dBRD9 and DMSO control was performed at different time-windows to  
118 evaluate which stage of reprogramming is responsive to BRD9 inhibition (Fig. 2E). Inhibition or  
119 degradation of BRD9 had the most effect on reprogramming efficiency when applied during the  
120 first 6 days after OSKM expression. As there were no further increases in the number of iPSCs  
121 with longer periods of chemical treatments, we concluded that BRD9 is a barrier for the initial  
122 stage of reprogramming (Fig. 2, F and G). In addition, the percentage of emerging TRA-1-60  
123 positive cells on day 6 of reprogramming, as assessed by flow cytometry, was significantly higher  
124 in BRD9 bromodomain inhibitor-treated cultures compared to controls at this early time-point  
125 (Fig. 2H and fig. S2F). Taken together, these results indicate that the initial stage of reprogramming  
126 is most sensitive to BRD9 inhibition and that even a transient BRD9 inhibition is sufficient to  
127 increase the efficiency of human iPSC generation.

### 128 **BRD9 inhibition and degradation enable iPSC generation without KLF4 and c-MYC.**

129 We previously reported that inhibition of somatic barriers to reprogramming can enable  
130 human iPSC generation with fewer Yamanaka factors (4, 10). To investigate if BRD9 inhibition  
131 may have a similar effect, we carried out reprogramming with only OSK or OS. In both  
132 circumstances, reprogramming efficiency was increased with BRD9 inhibition (Fig. 3, A and B).  
133 PCR with vector-specific primers validated the absence of KLF4 and MYC transgenes in genomic  
134 DNAs of iPSCs derived from OS-transduced fibroblasts (Fig. 3C). Importantly, iPSCs derived by  
135 OS transduction could be stably propagated and exhibited pluripotency characteristics such as  
136 silencing of retroviral transgenes, expression pluripotency markers such as OCT4, SSEA4 and  
137 NANOG and ability to form teratomas containing differentiated cells from all three germ layers

138 (Fig. 3, D, E and F). These results show that BRD9 inhibition can enable iPSC generation with  
139 fewer exogenous transcription factors.

140 **BRD9 is dispensable for human pluripotency induction and maintenance but required for**  
141 **mesoderm differentiation.**

142 While small molecules allow for transient inhibition or degradation of BRD9 during  
143 reprogramming, sgRNA expression in fibroblasts may result in a permanent knockout in the  
144 resulting iPSCs. We therefore wished to determine whether the TRA-1-60-positive colonies  
145 generated from fibroblasts expressing *BRD9* sgRNAs have a complete absence of BRD9 protein.  
146 iPSC colonies derived from control and *BRD9* sgRNA expressing fibroblasts were expanded in  
147 culture and BRD9 protein levels were examined (Fig. 4A). 9 iPSC lines out of 14 generated from  
148 *BRD9* sgRNA expressing fibroblasts did not express BRD9 at all, suggesting a homozygous  
149 knockout. 4 iPSC lines had reduced protein expression suggestive of a heterozygous knockout and  
150 1 iPSC colony retained wildtype levels of BRD9 (Fig. 4B). Complete knock-out clones robustly  
151 expressed OCT4, NANOG and SSEA4 similar to control iPSC lines (fig. S3A). The observation  
152 that the majority of the expanded clones expressed no BRD9 protein while exhibiting hallmarks  
153 of pluripotent stem cells suggests that loss of BRD9 is dispensable for human iPSC generation and  
154 propagation.

155 To further characterize the pluripotency BRD9 knock-out hiPSCs, we investigated their  
156 differentiation capacity. BRD9-knockout iPSCs were able to form teratomas containing cells from  
157 all three germ layers (Fig. 4C). However, we observed that tissues from mesoderm lineage were  
158 less abundant in histological sections of teratomas generated by BRD9-knockout iPSCs. This  
159 observation led us to hypothesize that BRD9 may have a role in mesoderm differentiation. To test

160 this, we differentiated two independent iPSC lines generated from two healthy donors into  
161 mesendoderm with WNT agonist CHIR99021 (32) and in the presence of small molecules  
162 targeting BRD9. Expression of *TBXT*, *EOMES* and *MIXL1*, well-established markers for  
163 mesendoderm, decreased upon BRD9 inhibition and degradation (Fig. 4D, fig. S3F). On the other  
164 hand, exit from pluripotency as judged by expression of *POU5F1*, *SOX2* and *NANOG* was not  
165 affected by BRD9 inhibition (Fig. 4D, fig. S3F). These results suggest that BRD9 is important for  
166 mesendodermal lineage commitment of human pluripotent stem cells.

167 Naïve mouse ESCs have been shown to be sensitive to BRD9 bromodomain inhibition  
168 when grown in serum and Lif (27), therefore we wished to further investigate the role of BRD9 in  
169 human pluripotent stem cells. We made use of an OCT4-GFP reporter human iPSC line (33) to  
170 monitor cell viability and self-renewal capacity upon BRD9 inhibition. BRD9 inhibitor or degrader  
171 treatment for 48 hours did not change the proliferation rate nor the percentage of OCT4-positive  
172 cells compared to controls (fig. S3, B, C and D). These results, in combination with the knockout  
173 iPSC lines, suggest that BRD9 is not required to maintain human pluripotency despite it being  
174 necessary for naïve pluripotency in the mouse (27). To specifically examine if the role of BRD9  
175 in pluripotency acquisition is species-specific, we reprogrammed mouse embryonic fibroblasts in  
176 the presence of small molecules targeting BRD9. BRD9 inhibition and degradation did not  
177 increase murine somatic cell reprogramming; in fact, we observed a modest decrease in efficiency  
178 with the degrader (fig. S3E). These results show that BRD9, in contrast to its function in murine  
179 naive PSCs, is not required for the induction and maintenance of human pluripotency.

180 **BRD9 maintains somatic-specific gene expression and enhancer accessibility**



181           Given that BRD9 inhibition is most effective in early reprogramming, where  
182 downregulation of the somatic cell gene expression program is a key rate-limiting step, we next  
183 sought to identify the transcriptional effects elicited by different modes of BRD9 inhibition. To  
184 this end, we performed mRNA-sequencing from fibroblasts treated with BI-7273, I-BRD9,  
185 dBRD9 as well as those expressing Cas9 and *BRD9* sgRNA. Small molecules targeting BRD9  
186 differentially downregulated 928, 170, 577 genes (dBRD9, I-BRD9, BI-7273, respectively), of  
187 which 70 were common to all treatments (fig. S4A). Gene ontology (GO) analysis of this common  
188 set of genes revealed that they were highly enriched in cellular process linked to fibroblast identity  
189 and function, such as epithelial-to-mesenchymal transition (EMT), extracellular matrix  
190 components and adhesion (Fig. 5A). More broadly, Gene Set Enrichment Analysis (GSEA)  
191 indicated epithelial-to-mesenchymal transition (EMT) gene sets were among the top most  
192 negatively regulated gene sets upon I-BRD9 and dBRD9 treatments (Fig. 5B). This finding led us  
193 to ask specifically whether the fibroblast expression program as a whole was downregulated upon  
194 BRD9 inhibition. To test this notion, we performed GSEA using a fibroblast-related gene set (307  
195 genes) that we generated based from gene expression profiles of human fibroblasts and their iPSC  
196 derivatives (10). All BRD9 perturbations resulted in a highly significant downregulation of the  
197 fibroblast-related gene set (Fig. 5C). In fact, the overall average expression values of genes in the  
198 fibroblast-related gene set were significantly downregulated upon BRD9 inhibition (Fig. 5D). In  
199 contrast, we did not observe positive enrichment of pluripotency-associated gene sets with any  
200 BRD9 perturbation, indicating that BRD9 inhibition on its own does not activate the pluripotency  
201 network (fig. S4B). Taken together, our transcriptomic analyses suggest that BRD9 acts as a barrier  
202 to reprogramming by sustaining starting cell type-specific gene expression.  
203

204 To gain insight into how BRD9 functions to maintain expression of somatic-specific genes  
205 and test whether BRD9 has a role in maintaining chromatin accessibility at such loci, we performed  
206 ATAC-seq (Assay for Transposase-Accessible Chromatin using sequencing) in fibroblasts treated  
207 with I-BRD9 and dBRD9. Both inhibitors had no effect on accessible chromatin regions around  
208 promoters marked by overlap of H3K27ac and H3K4me3 (Fig. 5E). However, BRD9 inhibition or  
209 degradation reduced the accessibility of chromatin around putative active enhancers in fibroblasts  
210 as marked by overlap of H3K27ac with H3K4me1 (Fig. 5F). Importantly, such fibroblast-specific  
211 enhancers start to lose accessibility upon OSKM expression, suggesting BRD9 inhibition  
212 augments this process (fig. S4C) (34). These results indicate that BRD9 constitutes a barrier to  
213 reprogramming by maintaining accessibility of active enhancers in the starting cell populations.

#### 214 ***MN1* and *ZBTB38* are BRD9 target genes that suppress reprogramming**

215 Among the most consistently downregulated genes upon BRD9 inhibition were  
216 transcriptional regulators *MN1* and *ZBTB38* (Fig. 6A). *MN1* has not been implicated in somatic  
217 cell reprogramming, but regulates palate development (35) and can act as co-factor for various  
218 transcription factors such as retinoic acid receptor/retinoic X receptor (RAR/RXR) (36). It is also  
219 implicated in transcriptional control of leukemic transformation in collaboration with DOT1L (37).  
220 *ZBTB38* is predicted to be a master regulator in fibroblasts and is controlled by a fibroblast specific  
221 super-enhancer (38). We hypothesized that downregulation of these two factors soon after OSKM  
222 expression is necessary for efficient reprogramming. To test this notion, we overexpressed *MN1*  
223 or *ZBTB38* along with OSKM in human fibroblasts which resulted in a significant impairment in  
224 reprogramming efficiency (Fig. 6, B, C and D). Interestingly, *ZBTB38* expression in fibroblasts  
225 also significantly reduced the number of emerging TRA-1-60-positive cells on day 6 (Fig. 6E).

226 Moreover, induction of pluripotency associated genes such as *NANOG*, *LEFTY2*, *LIN28A* were  
227 reduced at day 6 of reprogramming upon continued *ZBTB38* expression (Fig. 6F). These results  
228 BRD9 safeguards somatic cell identity and acts as a barrier to reprogramming in part by sustaining  
229 the expression these two transcriptional regulators (Fig 6G).

## 230 **Discussion**

231 In this study, we investigated the role of BRD9 in human somatic cell reprogramming to  
232 pluripotency via a combination of genetic and chemical perturbation approaches. Knockdown of  
233 BRD9 via RNA interference or knockout via CRISPR/Cas9 increased human reprogramming  
234 efficiency. Importantly, the contrasting effects of BRD9 and BRD7 inhibition on reprogramming  
235 efficiency indicate that the recently identified BRD9-containing ncBAF, but not BRD7-containing  
236 PBAF, is a major barrier to reprogramming. This notion is supported by our finding that loss of an  
237 additional specific member of ncBAF complex, *GLTSCR1*, has a similar positive effect on iPSC  
238 formation. To acutely block BRD9 function, we took advantage of selective bromodomain  
239 inhibitors and a PROTAC degrader, all of which significantly increased reprogramming efficiency  
240 and enabled iPSC generation in the absence of KLF4 and cMYC. Taken together, these findings  
241 demonstrate that BRD9-containing ncBAF complexes serve an important role in maintaining  
242 somatic cell identity.

243 Interestingly, we find that BRD9 is dispensable for induction and maintenance of human  
244 pluripotency. Fibroblasts expressing Cas9 and sgRNAs against *BRD9* could efficiently generate  
245 iPSCs that do not express any detectable BRD9 protein. Yet, such iPSC clones, and additional  
246 iPSCs treated with compounds targeting BRD9, could be propagated and expanded while retaining  
247 canonical properties of pluripotent stem cells. This is in contrast to the non-BRD9 containing ES-  
248 specific BAF complexes which are required for pluripotency and self-renewal (39). Interestingly,

249 naïve mESCs have been shown to lose self-renewal capacity and enter into a primed, epiblast-like  
250 transcriptional state upon BRD9 inhibition (27). Human iPSCs are considered to be in a primed  
251 state (REF), our data indicate that BRD9 is dispensable for their maintenance. It is therefore likely  
252 that BAF complexes other than ncBAF such as non-BRD9 containing ES-specific complexes  
253 support human primed pluripotency. It is also worth noting that mouse and human reprogramming  
254 systems may have distinct species-specific features in part due to chromatin organization (40, 41).  
255 In fact, we observed that murine reprogramming was not enhanced upon BRD9 inhibition nor  
256 degradation. Our findings are consistent with a recent study in which I-BRD9 were found not to  
257 increase reprogramming efficiency from mouse embryonic fibroblasts (42). Collectively, these  
258 observations point to species-specific roles for BRD9 in somatic cell reprogramming and  
259 maintenance of pluripotency.

260 Genomic analyses indicate that BRD9 inhibition leads to broad downregulation of  
261 fibroblast-enriched genes which is accompanied by decreased chromatin accessibility across  
262 putative active enhancers and cell-type specific super-enhancers. These results align with previous  
263 studies which show BRD9 occupancy at distal enhancers (26, 43) and co-localization with CTCF  
264 (23, 44). In addition, BRD9 have recently been shown to be crucial for maintaining cell-type  
265 specific transcription programs in regulatory T-cells (45). We identified several key transcription  
266 factors such as *MNI* and *ZBTB38* as BRD9 targets. Our functional data, along with recent studies,  
267 establish these BRD9-regulated genes as important barriers to reprogramming (46).

268 The present findings add BRD9 bromodomain inhibitors and degraders to the arsenal of  
269 small molecule inhibitors that can be used to regulate and direct cell fate changes in human somatic  
270 cells. We also show that BRD9 inhibition can be combined with other modulators such as DOT1L  
271 inhibitors to boost reprogramming efficiency. Importantly, inhibition of DOT1L-mediated H3K79

272 methylation facilitates the generation of chemically induced pluripotent stem cells (ciPSCs) from  
273 mouse somatic cells (47) and result in a permissive epigenome state which enables reprogramming  
274 by alternative transcription factors (48). Identification of BRD9 as a safeguarding mechanism of  
275 cell identity suggests that combinatorial perturbations which include BRD9 inhibitors can enhance  
276 various reprogramming methods. Such approaches will likely lead to rapid silencing of the initial  
277 somatic program and potentially be used to derive human ciPSCs as well as direct lineage-  
278 converted cells with high efficiency.

279

## 280 **Materials and Methods**

281 **Reprogramming assays.** Human fibroblasts (dH1f) and reprogramming assays were performed  
282 as described previously (10, 49). Unless stated otherwise in the text, I-BRD9, LP99, BI-7273 and  
283 dBRD9 were used at final concentrations of 1  $\mu$ M, 3  $\mu$ M, 1  $\mu$ M and 0.3  $\mu$ M, respectively, for the  
284 first two weeks of reprogramming. EPZ-004777 was used at final concentration of 3  $\mu$ M for the  
285 first week of reprogramming. HDF-A cells (ScienCell Research Laboratories, Catalog #2320)  
286 were reprogrammed with episomal vectors as described previously (50). For murine  
287 reprogramming, 25000 mouse embryonic fibroblasts (MEF) cells were seeded at each well of 12  
288 well plate. The next day, they were transduced by lentiviruses containing a single stem cell  
289 cassette (51). Next day culture media was replenished with small molecules at the final  
290 concentrations indicated for human somatic cell reprogramming conditions. At 5th day of  
291 reprogramming, cells were transferred on inactivated MEFs. Next day and every other day until  
292 14th day of reprogramming, culture media were replenished with mouse embryonic stem cell  
293 media (20% FBS, 1% NEAA, 1% Pen-Strep, 1% L-glutamine, 55nM 2-Mercaptoethanol, 1000

294 U/mL Leukemia Inhibitory Factor (LIF) (ESGRO, Catalog #ESG1107) in Knockout DMEM  
295 (Gibco, Catalog #10829-018)).

296 **iPSC culture and mesendodermal differentiation.** Individual iPSC colonies generated from  
297 BRD9 sgRNA and Cas9 expressing fibroblasts were manually picked and cultured on inactivated  
298 MEFs with hESC media and ROCK inhibitor Y-27632 at a final concentration of 10  $\mu$ M. After  
299 a few passages clones were transitioned to feeder-free conditions on matrigel (Corning, Catalog  
300 #354277)-coated plates with MEF-conditioned hESC media. iPSCs used for CHIR99021-  
301 induced mesendodermal differentiation experiments were picked from adult fibroblasts,  
302 electroporated with non-integrative episomal plasmids and cultured on feeder-free conditions on  
303 matrigel-coated plates with mTESR1 media (50, 52) . When the cells reached 40-60%  
304 confluency, they were treated with DMSO, 1  $\mu$ M I-BRD9 or 0.1  $\mu$ M dBRD9 in 5  $\mu$ M  
305 CHIR99021 in fibroblast media for 48 hours.

306 **Cloning.** sgRNA and shRNA oligonucleotides (Table S1) were cloned into lentiCRISPR v2  
307 (Addgene plasmid no. #52961) and into pSMP vector (Addgene plasmid no. #36394)  
308 respectively. shRNA cloning was performed as previously described with XhoI and EcoRI (4).  
309 In order to clone sgRNAs, lentiCRISPRv2 vector was digested with BsmBI enzyme and gel  
310 purified with MN PCR-Clean up Kit. Extracted DNA was treated with AP. Top and bottom  
311 guide RNAs were annealed with T4 Polynucleotide Kinase (3' phosphatase minus, NEB) and T4  
312 DNA Ligase Buffer (NEB) in a thermal cycler with the following settings: 37°C for 30 min,  
313 95°C for 4 min and then ramp down to 25°C at 5°C/min. Annealed oligos were diluted to 1:200  
314 and were used as inserts for ligating to digested lentiCRISPR v2 (50 ng) by T4 DNA Ligase  
315 (NEB) in 10X T4 DNA Ligase buffer (NEB). Ligation reaction were incubated for at least 2  
316 hours at room temperature. Ligation mix was vortexed and spun down. 50  $\mu$ l Stb13 bacteria

317 (NEB, Catalog: C737303) was mixed with 5  $\mu$ l of the ligation reaction and left on ice for at least  
318 15 minutes. Afterward, heat shock was applied at 42°C for 30 seconds in water bath. 150  $\mu$ l LB  
319 was supplemented and cultured in 37°C at 225 rpm in a shaker for 1 hour. The transformed  
320 bacteria were spread on LB agar plate with ampicillin or carbenicillin.

321 **Virus production and transduction.** Virus production was performed as described previously  
322 (10). Briefly,  $2.5 \times 10^6$  293T cells per 10-cm dish were plated. The next day, cells were  
323 transfected with 2.5  $\mu$ g viral vector, 0.25  $\mu$ g pCMV-VSV-G (Addgene plasmid no. 8454),  
324 2.25  $\mu$ g psPAX2 (Addgene plasmid no. 12260) for lentivirus or pUMVC (Addgene plasmid no.  
325 8449) for retroviruses using 20  $\mu$ l FuGENE 6 (Promega) in 400  $\mu$ l DMEM per plate.  
326 Supernatants were collected 48 h and 72 h post-transfection and filtered through 45- $\mu$ m pore size  
327 filters. Human fibroblasts were doubly transduced with either shRNA or CRISPR vectors in  
328 consecutive days in the presence of 8  $\mu$ g/ml protamine sulfate (Sigma). Transduced cells were  
329 selected by puromycin at 1  $\mu$ g/ml.

330 **Western Blot.** Cell pellets were resuspended in cytosolic lysis buffer (10mM HEPES pH 7.9,  
331 10mM KCl, 0.1mM EDTA, 0.4% NP-40, Protease Inhibitor (1X) (Roche)) and shaken on ice for  
332 15 minutes. After centrifugation at 3000g at 40C for 3 minutes, pellets were washed with  
333 cytosolic buffer again. Pellets were resuspended in nuclear lysis buffer (20mM HEPES pH 7.9,  
334 0.4M NaCl, 1mM EDTA, 10% Glycerol, Protease Inhibitor (1X) (Roche)) and sonicated at  
335 amplitude 40 for 10 seconds twice. Supernatant containing nuclear fragments was collected after  
336 centrifugation at 15000g at 40C for 5 minutes. Lysates were incubated at 95C for 15 minutes  
337 with 4X laemmli buffer (BioRad) containing  $\beta$ -mercaptoethanol (BioRad). Boiled samples and  
338 protein marker (Bio-rad, Catalog: 161-0374) were loaded on gel (BioRad, Catalog: 456-1084).  
339 Proteins were transferred on PVDF membrane (BioRad, Catalog: 1620177) by Bio-Rad trans-blot

340 turbo transfer system at mixed weight transfer setting and incubated in 5% blotting grade blocker  
341 (BioRad Catalog: 1706404) solution for 1 hour. Membranes were incubated with BRD9 antibody  
342 (Active Motif, Catalog: 61537) at 1:1000 ratio, BRD7 antibody (Cell Signaling, Catalog:  
343 D9K2T) at 1:1000 ratio and HDAC1 antibody (Santa Cruz, Catalog: sc-7872) at 1:500 ratio  
344 overnight at 40C. Next day, membranes were washed with TBS-T for 15 minutes three times and  
345 incubated with secondary antibody (Abcam, ab97051) for 1 hour at room temperature.  
346 Membranes were washed with TBS-T for 15 minutes 3 times and incubated shortly with ECL  
347 western blotting substrate (ThermoFisher) before imaging at LI-COR FC.

348 **Genomic DNA PCR.** Genomic DNA was extracted from cells with Nucleospin Tissue kit  
349 (catalog no. 740952.50) following manufacturer's instructions. 200 ng of genomic DNA was  
350 amplified with DreamTaq DNA Polymerase (catalog no. K1081) and indicated primer pairs  
351 (Table S1). OCT4, SOX2, KLF4 and c-MYC transgene-containing amplicons were amplified  
352 with 30 cycles of 30 s at 95 °C, 30 s at 54.5 °C and 60 s at 72 °C. Amplicons containing  
353 GLTSCR1L sgRNA-induced in-dels were amplified using a BIO-RAD T100 thermocycler with  
354 30 cycles of 30 s at 95 °C, 30 s at 66.7 °C and 60 s at 72 °C.

355 **T7 endonuclease assay.** PCR products containing GLTSCR1L-induced in-dels were purified by  
356 MN PCR-Clean up Kit. 400 ng of purified DNA was denatured and heteroduplexed using  
357 NEBuffer 2 (catalog no. B7002S) in a total volume of 19 µL with the following settings in a  
358 thermocycler: 5 minutes at 95 °C, ramping down to 85 °C with 2 °C/s, ramping down to 25 °C  
359 with 0.1 °C/s. 1 µL T7 endonuclease (catalog no. M0302L) was added into the heteroduplexed  
360 DNA reaction and mixed thoroughly. The reaction was incubated at 37 °C for 1 hour and  
361 visualized in BIO-RAD Gel Doc XR+ after running on agarose gels.  
362



363 **Flow cytometry.** Cell surface TRA-1-60 expression was analyzed with an Accuri C6 flow  
364 cytometer (BD) using PE-conjugated anti-human TRA-1-60-R antibody (Biolegend, catalog no.  
365 330610).

366 **Quantitative RT-PCR analyses.** qPCR assays were performed as described previously (10)  
367 with the indicated primers (Table S1).

368 **Cell proliferation assay.** OCT4-GFP iPSCs were seeded on matrigel-coated 96-well plates in  
369 mTESR1 media with ROCK inhibitor Y-27632 (10  $\mu$ M). When cells reach 40-60% confluency,  
370 they were treated with DMSO, 1  $\mu$ M I-BRD9 or 0.1  $\mu$ M dBRD9 in mTESR1 media for 48 hours.  
371 Cell proliferation was measured with the CellTiter-Glo Luminescent Cell Viability Assay  
372 (Promega) according to manufacturer's instructions using luminometric measurements with a  
373 plate reader (Synergy H1 Reader, BioTek).

374 **Immunostaining.** TRA-1-60 staining was performed as previously described (4) and anti-  
375 SSEA1 antibody (Biolegend, catalog no. 125604) was used to quantify MEF reprogramming.  
376 For immunofluorescence-based characterization of iPSCs, cells were passaged onto mitomycin-  
377 C-treated MEFs in hESC medium and carried out as previously described (10). The antibodies  
378 used were OCT4 (Abcam, catalog no. ab19857), SSEA4/A647 (BD, catalog no. 560218) and  
379 NANOG (Abcam, catalog no. ab21624). For NANOG and OCT4, Alexa-488-conjugated  
380 secondary antibodies (Molecular Probes) were used. Nuclei were stained with VECTASHIELD  
381 Antifade mounting medium with DAPI (H-1200-10).

382 **Teratoma assays.** All experiments were carried out under a protocol approved by Koç  
383 University Animal Experiments Ethics Committee and all relevant ethical regulations were  
384 complied with. Teratoma injections were performed as previously described (53).  
385

386 **RNA-sequencing and analysis.** Fibroblasts were treated for 5 days with DMSO, BI-7273 (1  
387  $\mu\text{M}$ ), I-BRD9 (1  $\mu\text{M}$ ) and dBRD9 (0.3  $\mu\text{M}$ ). In parallel, control gRNA (gNT1) and BRD9 g823-  
388 expressing cells were used. Total RNA was prepared using Direct-zol kit according to  
389 manufacturer's instructions (Zymo Research). Libraries were prepared using NEBNext Poly(A)  
390 mRNA Magnetic Isolation Module from the NEBNext ultra-directional RNA kit to create a first  
391 stranded library. Reads were mapped to hg19 built-in genome by HISAT2 after assessing their  
392 quality by FastQC. DESeq2 package was used to find differentially expressed genes between  
393 samples. Genes were considered as differentially regulated based on adjusted p-value<0.05. The  
394 formation of fibroblast-related gene set was described previously (10). Rank-ordered gene lists  
395 were used for gene-set enrichment analysis (54).

396 **ATAC-Sequencing and analysis.** ATAC-seq was performed using 100,000 cells for the  
397 transposition reaction as described previously (55) using in-house-produced Tn5 transposase.  
398 Subsequently, samples were purified using the GeneJET PCR purification kit (Thermo). PCR  
399 amplification was performed using the following protocol: 3 min at 72 °C, 30 s at 98 °C and 11  
400 cycles of 10 s at 98 °C, 30 s at 63 °C, and 3 min at 72 °C. The samples were then purified using  
401 the GeneJET PCR purification kit and eluted with 20  $\mu\text{l}$  of TE buffer. Samples were then run on  
402 a Tapestation (Agilent) to determine library size and quantification before paired-end (2  $\times$  41 bp)  
403 sequencing on a NextSeq 500 (Illumina) platform. Sequence reads were quality controlled with  
404 FastQC and mapped to the most recent human reference genome (hg38) using bowtie (56),  
405 allowing a maximum of 2 mismatches and only uniquely mapped reads. Reads with mapping  
406 quality score below 30 and blacklisted regions were filtered. DeepTools (57) ComputeMatrix  
407 and plotProfile commands were used to generate aggregate ATAC plots. For this, BigWig files  
408 were generated using deepTools bamCoverage command, eliminating duplicates and

409 normalizing by sequencing depth and effective genome size. Intersecting regions among  
410 fibroblast ChIP peaks for H3K27ac, H3K4me1 and H3K4me3 were identified using previously  
411 published fibroblast ChIP-seq data (10), calling the peaks using macs2 (58) with the parameters -  
412 -keep-dup 1 and -broad, and finding the intersecting regions using bedtools (59) intersect.

### 413 **Statistical Analysis**

414 Statistical analysis was performed using GraphPad Prism 8 for t-tests or R 4.0.2 for Wilcoxon-  
415 signed rank test. The test details, number of biological replicates and exact p-values were  
416 provided in related figure legends.

### 417 **References**

- 418 1. K. Takahashi, K. Tanabe, M. Ohnuki, M. Narita, T. Ichisaka, K. Tomoda, S. Yamanaka,  
419 Induction of Pluripotent Stem Cells from Adult Human Fibroblasts by Defined Factors.  
420 *Cell*. **131**, 861–872 (2007).
- 421 2. K. Takahashi, S. Yamanaka, Induction of Pluripotent Stem Cells from Mouse Embryonic  
422 and Adult Fibroblast Cultures by Defined Factors. *Cell*. **126**, 663–676 (2006).
- 423 3. B. Papp, K. Plath, Epigenetics of Reprogramming to Induced Pluripotency. *Cell*. **152**,  
424 1324–1343 (2013).
- 425 4. T. T. Onder, N. Kara, A. Cherry, A. U. Sinha, N. Zhu, K. M. Bernt, P. Cahan, B. O.  
426 Marcarci, J. Unternaehrer, P. B. Gupta, E. S. Lander, S. A. Armstrong, G. Q. Daley,  
427 Chromatin-modifying enzymes as modulators of reprogramming. *Nature*. **483**, 598–602  
428 (2012).
- 429 5. S. Cheloufi, U. Elling, B. Hopfgartner, Y. L. Jung, J. Murn, M. Ninova, M. Hubmann, A.  
430 I. Badeaux, C. Euong Ang, D. Tenen, D. J. Wesche, N. Abazova, M. Hogue, N. Tasdemir,  
431 J. Brumbaugh, P. Rathert, J. Jude, F. Ferrari, A. Blanco, M. Fellner, D. Wenzel, M.

- 432 Zinner, S. E. Vidal, O. Bell, M. Stadtfeld, H. Y. Chang, G. Almouzni, S. W. Lowe, J.  
433 Rinn, M. Wernig, A. Aravin, Y. Shi, P. J. Park, J. M. Penninger, J. Zuber, K.  
434 Hochedlinger, The histone chaperone CAF-1 safeguards somatic cell identity. *Nature*.  
435 **528**, 218–224 (2015).
- 436 6. Z. Shao, C. Yao, A. Khodadadi-Jamayran, W. Xu, T. M. Townes, M. R. Crowley, K. Hu,  
437 Reprogramming by De-bookmarking the Somatic Transcriptional Program through  
438 Targeting of BET Bromodomains. *Cell Rep.* **16**, 3138–3145 (2016).
- 439 7. C. J. Lynch, R. Bernad, I. Calvo, S. Nóbrega-Pereira, S. Ruiz, N. Ibarz, A. Martinez-Val,  
440 O. Graña-Castro, G. Gómez-López, E. Andrés-León, V. Espinosa Angarica, A. del Sol, S.  
441 Ortega, O. Fernandez-Capetillo, E. Rojo, J. Munoz, M. Serrano, The RNA Polymerase II  
442 Factor RPAP1 Is Critical for Mediator-Driven Transcription and Cell Identity. *Cell Rep*.  
443 **22**, 396–410 (2018).
- 444 8. J.-C. Cossec, I. Theurillat, C. Chica, S. Búa Aguín, X. Gaume, A. Andrieux, A. Iturbide,  
445 G. Jouvion, H. Li, G. Bossis, J.-S. Seeler, M.-E. Torres-Padilla, A. Dejean, SUMO  
446 Safeguards Somatic and Pluripotent Cell Identities by Enforcing Distinct Chromatin  
447 States. *Cell Stem Cell.* **23**, 742-757.e8 (2018).
- 448 9. E. Kolundzic, A. Ofenbauer, S. I. Bulut, B. Uyar, G. Baytek, A. Sommermeier, S. Seelk,  
449 M. He, A. Hirsekorn, D. Vucicevic, A. Akalin, S. Diecke, S. A. Lacadie, B. Tursun,  
450 FACT Sets a Barrier for Cell Fate Reprogramming in *Caenorhabditis elegans* and Human  
451 Cells. *Dev. Cell.* **46**, 611-626.e12 (2018).
- 452 10. A. Ebrahimi, K. Sevinç, G. Gürhan Sevinç, A. P. Cribbs, M. Philpott, F. Uyulur, T.  
453 Morova, J. E. Dunford, S. Göklemez, Ş. Arı, U. Oppermann, T. T. Önder, Bromodomain  
454 inhibition of the coactivators CBP/EP300 facilitate cellular reprogramming. *Nat. Chem.*

- 455 *Biol.* **15**, 519–528 (2019).
- 456 11. J. Brumbaugh, B. Di Stefano, K. Hochedlinger, Reprogramming: identifying the  
457 mechanisms that safeguard cell identity. *Development*. **146**, dev182170 (2019).
- 458 12. S. K. Hota, B. G. Bruneau, ATP-dependent chromatin remodeling during mammalian  
459 development. *Development*. **143**, 2882–2897 (2016).
- 460 13. C. Hodges, J. G. Kirkland, G. R. Crabtree, The Many Roles of BAF (mSWI/SNF) and  
461 PBAF Complexes in Cancer. *Cold Spring Harb. Perspect. Med.* . **6** (2016),  
462 doi:10.1101/cshperspect.a026930.
- 463 14. C. Kadoch, R. T. Williams, J. P. Calarco, E. L. Miller, C. M. Weber, S. M. G. Braun, J. L.  
464 Pulice, E. J. Chory, G. R. Crabtree, Dynamics of BAF–Polycomb complex opposition on  
465 heterochromatin in normal and oncogenic states. *Nat. Genet.* **49**, 213–222 (2017).
- 466 15. L. Ho, E. L. Miller, J. L. Ronan, W. Q. Ho, R. Jothi, G. R. Crabtree, EsBAF facilitates  
467 pluripotency by conditioning the genome for LIF/STAT3 signalling and by regulating  
468 polycomb function. *Nat. Cell Biol.* **13**, 903–913 (2011).
- 469 16. R. L. dos Santos, L. Tosti, A. Radzsheuskaya, I. M. Caballero, K. Kaji, B. Hendrich, J. C.  
470 R. Silva, MBD3/NuRD Facilitates Induction of Pluripotency in a Context-Dependent  
471 Manner. *Cell Stem Cell*. **15**, 102–110 (2014).
- 472 17. Q. Zhuang, W. Li, C. Benda, Z. Huang, T. Ahmed, P. Liu, X. Guo, D. P. Ibañez, Z. Luo,  
473 M. Zhang, M. M. Abdul, Z. Yang, J. Yang, Y. Huang, H. Zhang, D. Huang, J. Zhou, X.  
474 Zhong, X. Zhu, X. Fu, W. Fan, Y. Liu, Y. Xu, C. Ward, M. J. Khan, S. Kanwal, B. Mirza,  
475 M. D. Tortorella, H.-F. Tse, J. Chen, B. Qin, X. Bao, S. Gao, A. P. Hutchins, M. A.  
476 Esteban, NCoR/SMRT co-repressors cooperate with c-MYC to create an epigenetic  
477 barrier to somatic cell reprogramming. *Nat. Cell Biol.* **20**, 400–412 (2018).

- 478 18. N. Singhal, J. Graumann, G. Wu, M. J. Araúzo-Bravo, D. W. Han, B. Greber, L. Gentile,  
479 M. Mann, H. R. Schöler, Chromatin-Remodeling Components of the BAF Complex  
480 Facilitate Reprogramming. *Cell*. **141**, 943–955 (2010).
- 481 19. L. Wang, Y. Du, J. M. Ward, T. Shimbo, B. Lackford, X. Zheng, Y. Miao, B. Zhou, L.  
482 Han, D. C. Fargo, R. Jothi, C. J. Williams, P. A. Wade, G. Hu, INO80 Facilitates  
483 Pluripotency Gene Activation in Embryonic Stem Cell Self-Renewal, Reprogramming,  
484 and Blastocyst Development. *Cell Stem Cell*. **14**, 575–591 (2014).
- 485 20. Z. Jiang, Y. Tang, X. Zhao, M. Zhang, D. M. Donovan, X. (Cindy) Tian, Knockdown of  
486 Brm and Baf170, Components of Chromatin Remodeling Complex, Facilitates  
487 Reprogramming of Somatic Cells. *Stem Cells Dev*. **24**, 2328–2336 (2015).
- 488 21. A. Alpsy, E. C. Dykhuizen, Glioma tumor suppressor candidate region gene 1  
489 (GLTSCR1) and its paralog GLTSCR1-like form SWI/SNF chromatin remodeling  
490 subcomplexes. *J. Biol. Chem*. **293**, 3892–3903 (2018).
- 491 22. N. Mashtalir, A. R. D’Avino, B. C. Michel, J. Luo, J. Pan, J. E. Otto, H. J. Zullo, Z. M.  
492 McKenzie, R. L. Kubiak, R. St Pierre, A. M. Valencia, S. J. Poynter, S. H. Cassel, J. A.  
493 Ranish, C. Kadoch, Modular Organization and Assembly of SWI/SNF Family Chromatin  
494 Remodeling Complexes. *Cell*. **175**, 1272–1288 (2018).
- 495 23. B. C. Michel, A. R. D’Avino, S. H. Cassel, N. Mashtalir, Z. M. McKenzie, M. J. McBride,  
496 A. M. Valencia, Q. Zhou, M. Bocker, L. M. M. Soares, J. Pan, D. I. Remillard, C. A.  
497 Lareau, H. J. Zullo, N. Fortoul, N. S. Gray, J. E. Bradner, H. M. Chan, C. Kadoch, A  
498 non-canonical SWI/SNF complex is a synthetic lethal target in cancers driven by BAF  
499 complex perturbation. *Nat. Cell Biol*. **20** (2018), doi:10.1038/s41556-018-0221-1.
- 500 24. X. Wang, S. Wang, E. C. Troisi, T. P. Howard, J. R. Haswell, B. K. Wolf, W. H. Hawk, P.

- 501 Ramos, E. M. Oberlick, E. P. Tzvetkov, A. Ross, F. Vazquez, W. C. Hahn, P. J. Park, C.  
502 W. M. Roberts, BRD9 defines a SWI/SNF sub-complex and constitutes a specific  
503 vulnerability in malignant rhabdoid tumors. *Nat. Commun.* **10**, 1881 (2019).
- 504 25. J. Pan, R. M. Meyers, B. C. Michel, N. Mashtalir, A. E. Sizemore, J. N. Wells, S. H.  
505 Cassel, F. Vazquez, B. A. Weir, W. C. Hahn, J. A. Marsh, A. Tsherniak, C. Kadoch,  
506 Interrogation of Mammalian Protein Complex Structure, Function, and Membership Using  
507 Genome-Scale Fitness Screens. *Cell Syst.* **6**, 555-568.e7 (2018).
- 508 26. N. Del Gaudio, A. Di Costanzo, N. Q. Liu, L. Conte, A. Migliaccio, M. Vermeulen, J. H.  
509 A. Martens, H. G. Stunnenberg, A. Nebbioso, L. Altucci, BRD9 binds cell type-specific  
510 chromatin regions regulating leukemic cell survival via STAT5 inhibition. *Cell Death Dis.*  
511 **10**, 338 (2019).
- 512 27. J. Gatchalian, S. Malik, J. Ho, D.-S. Lee, T. W. R. Kelso, M. N. Shokhirev, J. R. Dixon,  
513 D. C. Hargreaves, A non-canonical BRD9-containing BAF chromatin remodeling  
514 complex regulates naive pluripotency in mouse embryonic stem cells. *Nat. Commun.* **9**,  
515 5139 (2018).
- 516 28. P. G. K. Clark, L. C. C. Vieira, C. Tallant, O. Fedorov, D. C. Singleton, C. M. Rogers, O.  
517 P. Monteiro, J. M. Bennett, R. Baronio, S. Müller, D. L. Daniels, J. Méndez, S. Knapp, P.  
518 E. Brennan, D. J. Dixon, LP99: Discovery and Synthesis of the First Selective BRD7/9  
519 Bromodomain Inhibitor. *Angew. Chemie Int. Ed.* **54**, 6217–6221 (2015).
- 520 29. L. J. Martin, M. Koegl, G. Bader, X.-L. Cockcroft, O. Fedorov, D. Fiegen, T. Gerstberger,  
521 M. H. Hofmann, A. F. Hohmann, D. Kessler, S. Knapp, P. Knesl, S. Kornigg, S. Müller,  
522 H. Nar, C. Rogers, K. Rumpel, O. Schaaf, S. Steurer, C. Tallant, C. R. Vakoc, M. Zeeb, A.  
523 Zoephel, M. Pearson, G. Boehmelt, D. McConnell, Structure-Based Design of an in Vivo

- 524 Active Selective BRD9 Inhibitor. *J. Med. Chem.* **59**, 4462–4475 (2016).
- 525 30. N. H. Theodoulou, P. Bamborough, A. J. Bannister, I. Becher, R. A. Bit, K. H. Che, C. W.  
526 Chung, A. Dittmann, G. Drewes, D. H. Drewry, L. Gordon, P. Grandi, M. Leveridge, M.  
527 Lindon, A. M. Michon, J. Molnar, S. C. Robson, N. C. O. Tomkinson, T. Kouzarides, R.  
528 K. Prinjha, P. G. Humphreys, Discovery of I-BRD9, a Selective Cell Active Chemical  
529 Probe for Bromodomain Containing Protein 9 Inhibition. *J. Med. Chem.* **59**, 1425–1439  
530 (2016).
- 531 31. D. Remillard, D. L. Buckley, J. Paulk, G. L. Brien, M. Sonnett, H. S. Seo, S. Dastjerdi, M.  
532 Wühr, S. Dhe-Paganon, S. A. Armstrong, J. E. Bradner, Degradation of the BAF Complex  
533 Factor BRD9 by Heterobifunctional Ligands. *Angew. Chemie - Int. Ed.* **56**, 5738–5743  
534 (2017).
- 535 32. A. Q. Lam, B. S. Freedman, R. Morizane, P. H. Lerou, M. T. Valerius, J. V Bonventre,  
536 Rapid and efficient differentiation of human pluripotent stem cells into intermediate  
537 mesoderm that forms tubules expressing kidney proximal tubular markers. *J. Am. Soc.*  
538 *Nephrol.* **25**, 1211–1225 (2014).
- 539 33. D. Balboa, J. Weltner, Y. Novik, S. Eurola, K. Wartiovaara, T. Otonkoski, Generation of  
540 an OCT4 reporter human induced pluripotent stem cell line using CRISPR/SpCas9. *Stem*  
541 *Cell Res.* **23**, 105–108 (2017).
- 542 34. D. Li, J. Liu, X. Yang, C. Zhou, J. Guo, C. Wu, Y. Qin, L. Guo, J. He, S. Yu, H. Liu, X.  
543 Wang, F. Wu, J. Kuang, A. P. Hutchins, J. Chen, D. Pei, Chromatin Accessibility  
544 Dynamics during iPSC Reprogramming. *Cell Stem Cell.* **21**, 819-833.e6 (2017).
- 545 35. C. C. Y. Mak, D. Doherty, A. E. Lin, N. Vegas, M. T. Cho, G. Viot, C. Dimartino, J. D.  
546 Weisfeld-Adams, D. Lessel, S. Joss, C. Li, C. Gonzaga-Jauregui, Y. A. Zarate, N. Ehmke,



- 547 D. Horn, C. Troyer, S. G. Kant, Y. Lee, G. E. Ishak, G. Leung, A. Barone Pritchard, S.  
548 Yang, E. G. Bend, F. Filippini, C. Roadhouse, N. Lebrun, M. G. Mehaffey, P.-M. Martin,  
549 B. Apple, F. Millan, O. Puk, M. J. V Hoffer, L. B. Henderson, R. McGowan, I. M.  
550 Wentzensen, S. Pei, F. R. Zahir, M. Yu, W. T. Gibson, A. Seman, M. Steeves, J. R.  
551 Murrell, S. Luettgen, E. Francisco, T. M. Strom, L. Amlie-Wolf, A. M. Kaindl, W. G.  
552 Wilson, S. Halbach, L. Basel-Salmon, N. Lev-El, J. Denecke, L. E. L. M. Vissers, K.  
553 Radtke, J. Chelly, E. Zackai, J. M. Friedman, M. J. Bamshad, D. A. Nickerson, U. of W.  
554 C. for M. Genomics, R. R. Reid, K. Devriendt, J.-H. Chae, E. Stolerman, C. McDougall,  
555 Z. Powis, T. Bienvenu, T. Y. Tan, N. Orenstein, W. B. Dobyns, J. T. Shieh, M. Choi, D.  
556 Waggoner, K. W. Gripp, M. J. Parker, J. Stoler, S. Lyonnet, V. Cormier-Daire, D.  
557 Viskochil, T. L. Hoffman, J. Amiel, B. H. Y. Chung, C. T. Gordon, MN1 C-terminal  
558 truncation syndrome is a novel neurodevelopmental and craniofacial disorder with partial  
559 rhombencephalosynapsis. *Brain*. **143**, 55–68 (2020).
- 560 36. M. A. Meester-Smoor, M. J. F. W. Janssen, G. C. Grosveld, A. de Klein, W. F. J. van  
561 IJcken, H. Douben, E. C. Zwarthoff, MN1 affects expression of genes involved in  
562 hematopoiesis and can enhance as well as inhibit RAR/RXR-induced gene expression.  
563 *Carcinogenesis*. **29**, 2025–2034 (2008).
- 564 37. S. S. Riedel, J. N. Haladyna, M. Bezzant, B. Stevens, D. A. Pollyea, A. U. Sinha, S. A.  
565 Armstrong, Q. Wei, R. M. Pollock, S. R. Daigle, C. T. Jordan, P. Ernst, T. Neff, K. M.  
566 Bernt, MLL1 and DOT1L cooperate with meninoma-1 to induce acute myeloid  
567 leukemia. *J. Clin. Invest.* **126**, 1438–1450 (2016).
- 568 38. D. HniszBrian, D. Hnisz, B. J. Abraham, T. I. Lee, A. Lau, V. Saint-André, A. A. Sigova,  
569 H. A. Hoke, R. A. Young, D. HniszBrian, Super-Enhancers in the Control of Cell Identity

- 570 and Disease. *Cell*. **155**, 934–947 (2013).
- 571 39. L. Ho, J. L. Ronan, J. Wu, B. T. Staahl, L. Chen, A. Kuo, J. Lessard, A. I. Nesvizhskii, J.  
572 Ranish, G. R. Crabtree, An embryonic stem cell chromatin remodeling complex, esBAF,  
573 is essential for embryonic stem cell self-renewal and pluripotency. *Proc. Natl. Acad. Sci.*  
574 *U. S. A.* **106**, 5181–6 (2009).
- 575 40. K. Fu, C. Chronis, A. Soufi, G. Bonora, M. Edwards, S. T. Smale, K. S. Zaret, K. Plath,  
576 M. Pellegrini, Comparison of reprogramming factor targets reveals both species-specific  
577 and conserved mechanisms in early iPSC reprogramming. *BMC Genomics*. **19**, 956  
578 (2018).
- 579 41. K.-P. Kim, Y. Wu, J. Yoon, K. Adachi, G. Wu, S. Velychko, C. M. MacCarthy, B. Shin,  
580 A. Röpke, M. J. Arauzo-Bravo, M. Stehling, D. W. Han, Y. Gao, J. Kim, S. Gao, H. R.  
581 Schöler, Reprogramming competence of OCT factors is determined by transactivation  
582 domains. *Sci. Adv.* **6** (2020), doi:10.1126/sciadv.aaz7364.
- 583 42. A. Janiszewski, I. Talon, J. Chappell, S. Collombet, J. Song, N. De Geest, S. K. To, G.  
584 Bervoets, O. Marin-Bejar, C. Provenzano, L. Vanheer, J.-C. Marine, F. Rambow, V.  
585 Pasque, Dynamic reversal of random X-Chromosome inactivation during iPSC  
586 reprogramming. *Genome Res.* **29**, 1659–1672 (2019).
- 587 43. M. C. Bell, P. Raffener, R. J. Hart, K. P. Vogt, PIK3CA Cooperates with KRAS to  
588 Promote MYC Activity and Tumorigenesis via the Bromodomain Protein BRD9. *Cancers*  
589 **11** (2019), , doi:10.3390/cancers11111634.
- 590 44. D. Inoue, G.-L. Chew, B. Liu, B. C. Michel, J. Pangallo, A. R. D’Avino, T. Hitchman, K.  
591 North, S. C.-W. Lee, L. Bitner, A. Block, A. R. Moore, A. Yoshimi, L. Escobar-Hoyos, H.  
592 Cho, A. Penson, S. X. Lu, J. Taylor, Y. Chen, C. Kadoch, O. Abdel-Wahab, R. K.

- 593 Bradley, Spliceosomal disruption of the non-canonical BAF complex in cancer. *Nature*.  
594 **574**, 432–436 (2019).
- 595 45. C.-S. Loo, J. Gatchalian, Y. Liang, M. Leblanc, M. Xie, J. Ho, B. Venkatraghavan, D. C.  
596 Hargreaves, Y. Zheng, A Genome-wide CRISPR Screen Reveals a Role for the Non-  
597 canonical Nucleosome-Remodeling BAF Complex in Foxp3 Expression and Regulatory  
598 T Cell Function. *Immunity*. **53**, 143-157.e8 (2020).
- 599 46. I. Mellis, H. Edelstein, R. Truitt, L. Beck, O. Symmons, Y. Goyal, M. Dunagin, R.  
600 Saldana, P. Shah, W. Yang, R. Jain, A. Raj, *bioRxiv*, in press,  
601 doi:10.1101/2020.06.11.147207.
- 602 47. Y. Zhao, T. Zhao, J. Guan, X. Zhang, Y. Fu, J. Ye, J. Zhu, G. Meng, J. Ge, S. Yang, L.  
603 Cheng, Y. Du, C. Zhao, T. Wang, L. Su, W. Yang, H. Deng, A XEN-like State Bridges  
604 Somatic Cells to Pluripotency during Chemical Reprogramming. *Cell*. **163**, 1678–1691  
605 (2015).
- 606 48. K.-P. Kim, J. Choi, J. Yoon, J. M. Bruder, B. Shin, J. Kim, M. J. Arauzo-Bravo, D. Han,  
607 G. Wu, D. W. Han, J. Kim, P. Cramer, H. R. Schöler, Permissive epigenomes endow  
608 reprogramming competence to transcriptional regulators. *Nat. Chem. Biol.* **17**, 47–56  
609 (2021).
- 610 49. I. H. Park, R. Zhao, J. A. West, A. Yabuuchi, H. Huo, T. A. Ince, P. H. Lerou, M. W.  
611 Lensch, G. Q. Daley, Reprogramming of human somatic cells to pluripotency with  
612 defined factors. *Nature*. **451**, 141–146 (2008).
- 613 50. K. Fidan, G. Kavaklıoğlu, A. Ebrahimi, C. Özlü, N. Z. Ay, A. Ruacan, A. Gül, T. T.  
614 Önder, Generation of integration-free induced pluripotent stem cells from a patient with  
615 Familial Mediterranean Fever (FMF). *Stem Cell Res.* **15**, 694–696 (2015).

- 616 51. C. A. Sommer, M. Stadtfeld, G. J. Murphy, K. Hochedlinger, D. N. Kotton, G.  
617 Mostoslavsky, Induced pluripotent stem cell generation using a single lentiviral stem cell  
618 cassette. *Stem Cells*. **27**, 543–549 (2009).
- 619 52. A. Alici-Garipcan, B. Özçimen, I. Süder, V. Ülker, T. T. Önder, N. Özören, NLRP7 plays  
620 a functional role in regulating BMP4 signaling during differentiation of patient-derived  
621 trophoblasts. *Cell Death Dis*. **11**, 658 (2020).
- 622 53. K. Fidan, A. Ebrahimi, Ö. H. Çağlayan, B. Özçimen, T. T. Önder, in *Methods in*  
623 *molecular biology (Clifton, N.J.)* (2015), vol. 1353, pp. 215–231.
- 624 54. A. Subramanian, P. Tamayo, V. K. Mootha, S. Mukherjee, B. L. Ebert, M. A. Gillette, A.  
625 Paulovich, S. L. Pomeroy, T. R. Golub, E. S. Lander, J. P. Mesirov, Gene set enrichment  
626 analysis: a knowledge-based approach for interpreting genome-wide expression profiles.  
627 *Proc. Natl. Acad. Sci. U. S. A.* **102**, 15545–50 (2005).
- 628 55. J. D. Buenrostro, P. G. Giresi, L. C. Zaba, H. Y. Chang, W. J. Greenleaf, Transposition of  
629 native chromatin for fast and sensitive epigenomic profiling of open chromatin, DNA-  
630 binding proteins and nucleosome position. *Nat. Methods*. **10**, 1213–1218 (2013).
- 631 56. B. Langmead, C. Trapnell, M. Pop, S. L. Salzberg, Ultrafast and memory-efficient  
632 alignment of short DNA sequences to the human genome. *Genome Biol*. **10**, R25 (2009).
- 633 57. F. Ramírez, D. P. Ryan, B. Grüning, V. Bhardwaj, F. Kilpert, A. S. Richter, S. Heyne, F.  
634 Dündar, T. Manke, deepTools2: a next generation web server for deep-sequencing data  
635 analysis. *Nucleic Acids Res*. **44**, W160-5 (2016).
- 636 58. Y. Zhang, T. Liu, C. A. Meyer, J. Eeckhoute, D. S. Johnson, B. E. Bernstein, C. Nusbaum,  
637 R. M. Myers, M. Brown, W. Li, X. S. Liu, Model-based Analysis of ChIP-Seq (MACS).  
638 *Genome Biol*. **9**, R137 (2008).

639 59. A. R. Quinlan, I. M. Hall, BEDTools: a flexible suite of utilities for comparing genomic  
640 features. *Bioinformatics*. **26**, 841–842 (2010).

641

## 642 **Acknowledgments**

643 We would like to thank Ahmet Kocabay and Ali Cihan Taşkın for help with mouse  
644 experiments, Arzu Ruacan (Koç University, School of Medicine, Department of Pathology) for  
645 examination of histological sections. The authors gratefully acknowledge use of the services and  
646 facilities of the Koç University Research Center for Translational Medicine (KUTTAM), funded  
647 by the Republic of Turkey Ministry of Development. The content is solely the responsibility of  
648 the authors and does not necessarily represent the official views of the Ministry of Development.  
649 KS and DHA were supported by TUBITAK BİDEB Scholarship.

650

## 651 **Funding:**

652 Newton Advanced Fellowship (TTO)

653 TUBITAK Projects 231S182 and 219Z209 (TTO)

654 Arthritis Research UK, program grant 20522 (UO)

655 Cancer Research UK (UO)

656 LEAN project of the Leducq Foundation (UO)

657 People Programme Marie Curie Actions of the European Union's Seventh Framework

658 Programme FP7/2007-2013 under REA grant agreement n° 609305 (UO)

659

## 660 **Author contributions:**

661 Conceptualization: KS, GGS, UO, TTO

662 Software: KS, ADC, APC

663 Formal analysis: KS, GGS, ADC, TTO

664 Investigation: KS, GGS, MP, SK, HC, ESA, HAD

665 Resources: APC, JED, ABD, LHS, JQ

666 Data Curation: KS, ADC, MP, APC

667 Writing—original draft: KS, TTO

668 Writing—review & editing: GGS, ADC, SK, JQ, UO

669 Supervision: JQ, UO, TTO

670 Funding acquisition: UO, TTO

671

672 **Competing interests:** Authors declare that they have no competing interests.

673

674 **Data and materials availability:**

675 RNA-sequencing and ATAC-sequencing data are deposited to the NCBI GEO database with the

676 accession number GSE161640. Necessary information to produce materials and replicate

677 analysis is provided in the main text or the supplementary materials.

678

679 **Figures and Tables**  
680 **Figure 1**

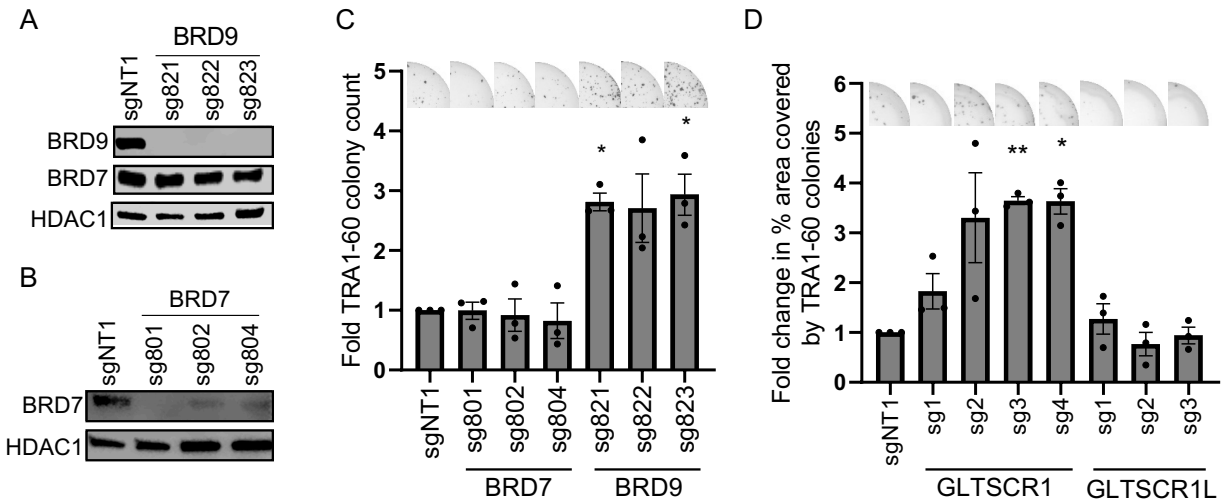

681  
682  
683  
684  
685

686 **Figure 1. Genetic suppression of ncBAF-specific subunits increases reprogramming**  
687 **efficiency. (A)** Western blots for BRD9 and BRD7 in fibroblasts expressing control (sgNT1) and  
688 BRD9-targeting gRNAs. HDAC1 serves as loading control. **(B)** Western blots for BRD7 in  
689 fibroblasts expressing control (sgNT1) and BRD7-targeting gRNAs. HDAC1 serves as loading  
690 control. **(C)** Fold change in the number of TRA-1-60-positive colonies for indicated sgRNA-  
691 expressing cells compared to control sgNT1-expressing cells. Representative well images are  
692 shown above the graph. Bar graphs show the mean and error bars represent standard error of  
693 mean. N=3, biological replicates. P-values are calculated by one sample t-test for  $\mu=1$ . \*  
694 denotes  $p<0.05$ , exact p-values from left to right are: 0.9593, 0.7910, 0.6173, 0.0065, 0.0968,  
695 0.0302. **(D)** Fold change in percent area covered by TRA-1-60-positive colonies generated from  
696 fibroblasts expressing *GLTSCR1* or *GLTSCR1L* sgRNAs compared to control sgNT1.  
697 Representative well images are above relative bars. Bar graphs show the mean and error bars  
698 represent standard error of mean. N=3, three biological replicates. P-values are calculated by one  
699 sample t-test for  $\mu=1$ . \* denotes  $p<0.05$ , \*\* denotes  $p<0.005$ , exact p-values from left to right  
700 are: 0.1442, 0.1248, 0.0009, 0.0092, 0.4638, 0.4252, 0.7585.  
701

702 **Figure 2**

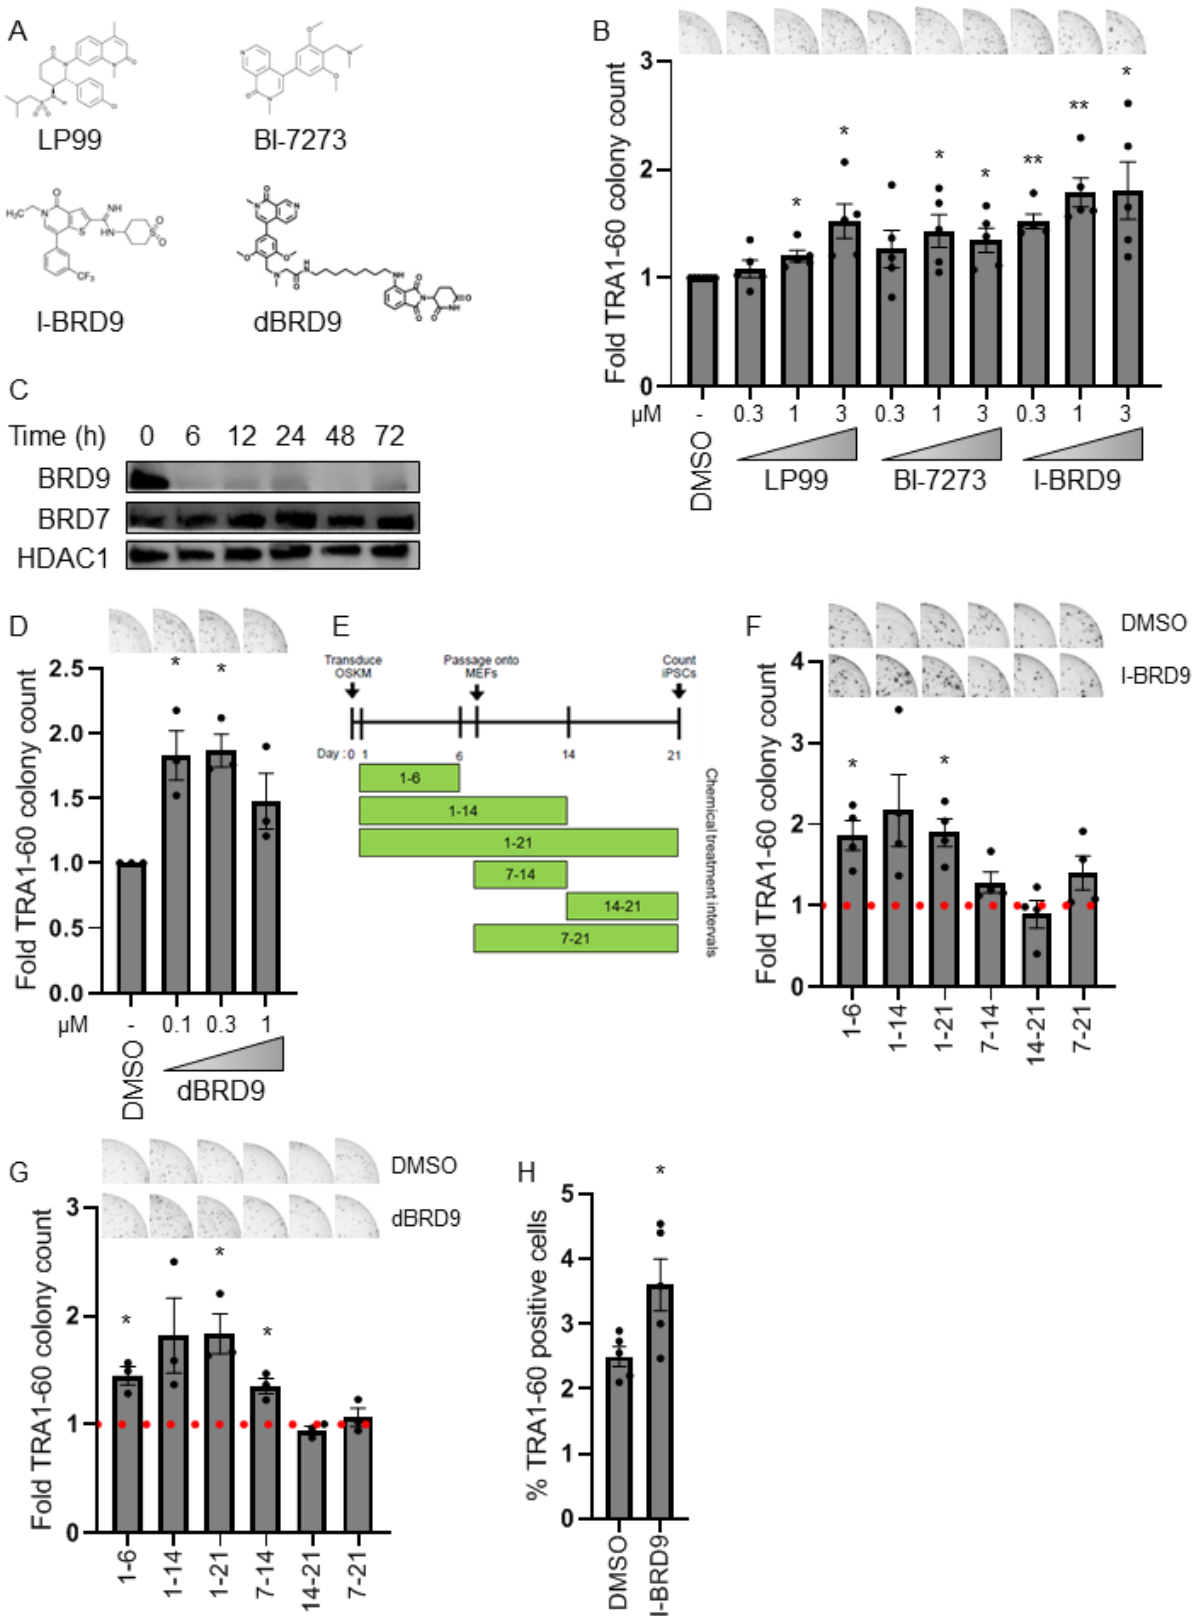

703



704

705 **Figure 2. Bromodomain inhibition and degradation of BRD9 facilitate reprogramming. (A)**  
706 Chemical structures of LP99, BI-7273, I-BRD9 and dBRD9. **(B)** Fold change in the number of  
707 TRA-1-60-positive colonies with the indicated compound treatments compared to DMSO  
708 control. Representative well images are shown above. Bar graphs show the mean and error bars  
709 represent standard error of mean. n=5, biological replicates for each treatment with 3 technical  
710 replicates. p-values are calculated by one sample t-test for  $\mu=1$ . \* denotes  $p<0.05$ , \*\* denotes  
711  $p<0.005$ , exact p-values from left to right are: 0.3555, 0.0175, 0.0294, 0.1954, 0.0443, 0.0364,  
712 0.0015, 0.0042, 0.0387. **(C)** Western blots for BRD9 and BRD7 at indicated time points after  
713 treatment with 0.3  $\mu\text{M}$  dBRD9. HDAC1 serves as loading control. **(D)** Fold change in the  
714 number of TRA-1-60-positive colonies with increasing concentrations of dBRD9 compared to  
715 DMSO. Representative well images are above the graph. Bar graphs show the mean and error  
716 bars represent standard error of mean. n=3, biological replicates. p-values are calculated by one  
717 sample t-test for  $\mu=1$ . \* denotes  $p<0.05$ , exact p-values from left to right are: 0.0488, 0.0204,  
718 0.1550. **(E)** Schematic depicting the time intervals for treatment of compounds during  
719 reprogramming. **(F)** Fold change in the number of TRA-1-60-positive colonies upon I-BRD9  
720 treatment compared to DMSO between indicated days of reprogramming. Representative well  
721 images are above the graph. Bar graphs show the mean and error bars represent standard error of  
722 mean. n=4, independent biological replicates. p-values were calculated by one sample t-test for  
723  $\mu=1$ . \* denotes  $p<0.05$ , exact p-values from left to right are: 0.0178, 0.0771, 0.0139, 0.1116,  
724 0.5826, 0.1492. **(G)** Fold change in the number of TRA-1-60-positive colonies upon dBRD9  
725 treatment compared to DMSO between indicated days of reprogramming. Representative well  
726 images are above the graph. Bar graphs show the mean and error bars represent standard error of  
727 mean. n=3, independent biological replicates. p-values are calculated by one sample t-test for  
728  $\mu=1$ . \* denotes  $p<0.05$ , exact p-values from left to right are: 0.0332, 0.1417, 0.0456, 0.0376,  
729 0.3099, 0.5208. **(H)** Percentage of TRA-1-60-positive cells on day 6 of reprogramming with  
730 DMSO and I-BRD9 treatment. Bar graphs show the mean and error bars represent standard error  
731 of mean. n=5, five biological replicates. p-values are calculated by two sample t-test. \* denotes  
732  $p<0.05$ , exact p-value: 0.0474.  
733

734 **Figure 3**

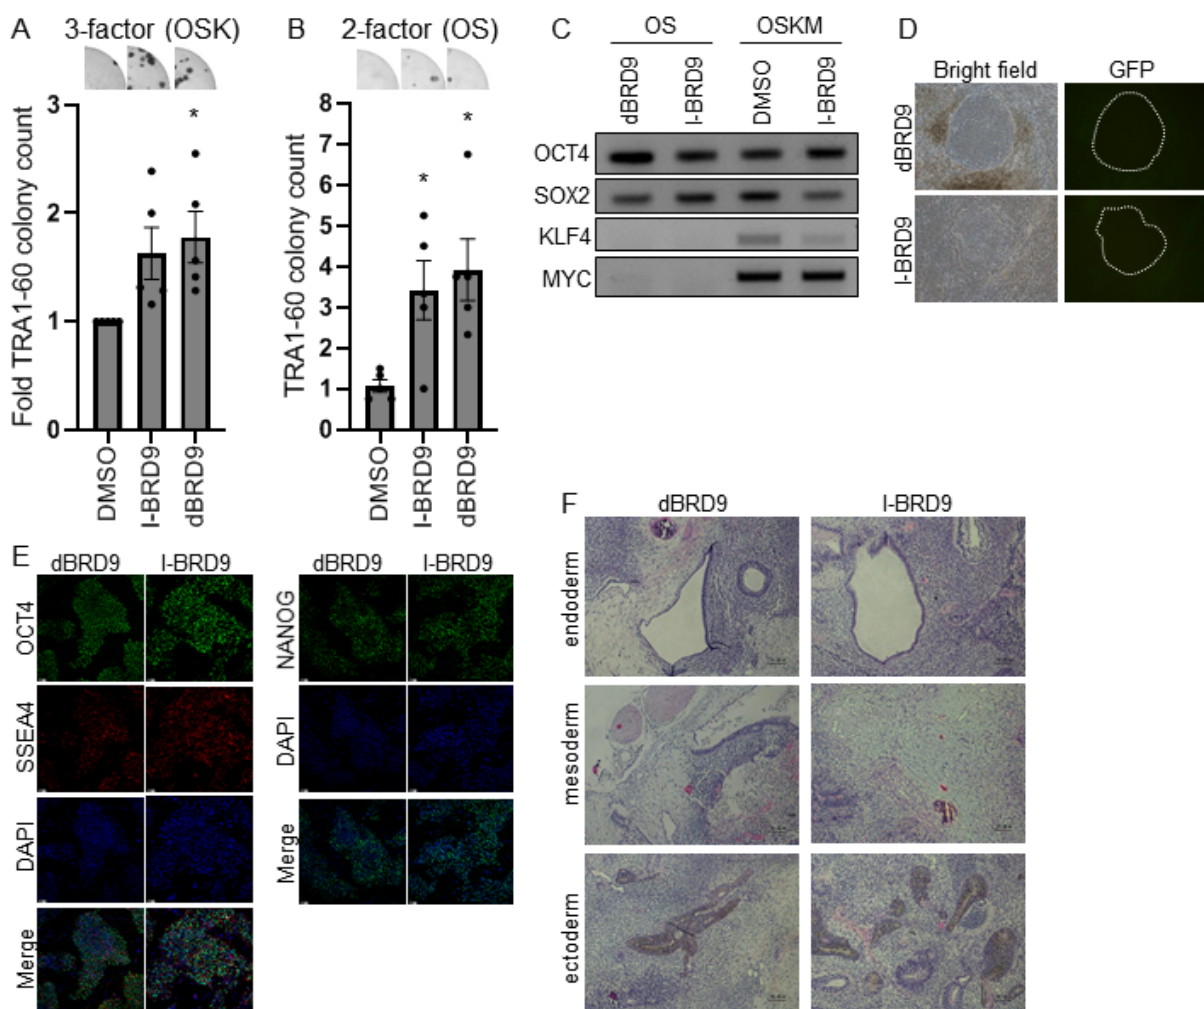

735  
 736 **Figure 3. BRD9 inhibition and degradation enable iPSC generation without KLF4 and c-**  
 737 **MYC. (A)** Fold change in the number of TRA-1-60-positive colonies generated by OCT4, SOX2  
 738 and KLF4 (OSK) in the presence of DMSO, I-BRD9 or dBRD9. Representative well images are  
 739 above the graph. Bar graphs show the mean and error bars represent standard error of mean. n=5,  
 740 five biological replicates. p-values are calculated by one sample t-test for  $\mu=1$ . Exact p-values  
 741 from left to right are: 0.0583, 0.0297. **(B)** Number of TRA-1-60 positive colonies generated by  
 742 OCT4 and SOX2 (OS) in the presence of DMSO, I-BRD9 or dBRD9. Representative well  
 743 images are above the graph. n=5, biological replicates with at least 3 technical replicates. p-  
 744 values are calculated by two sample t-test. \* denotes  $p<0.05$ , exact p-values from left to right are:  
 745 0.0302, 0.0182. **(C)** Agarose gel images of PCR products for exogenous OCT4, SOX2, KLF4  
 746 and c-MYC transgenes in iPSCs generated from fibroblasts with indicated induction and  
 747 treatments. **(D)** Phase contrast and GFP fluorescence images of colonies derived by OS induction  
 748 and dBRD9 (upper) or I-BRD9 (lower) treatments showing typical iPSC morphology and  
 749 silencing of retroviral GFP transgene. **(E)** OCT4, SSEA4 (left) and NANOG (right)  
 750 immunofluorescence of iPSCs derived from OS expressing fibroblasts treated with indicated  
 751 treatments. Hoechst 33324 was used to stain the nuclei. **(F)** Hematoxylin and eosin stained

752 sections of teratomas of iPSCs derived from OS-expressing fibroblasts treated with dBRD9 or I-  
753 BRD9 show tissues from endoderm, ectoderm and mesoderm lineages.  
754

755 **Figure 4**

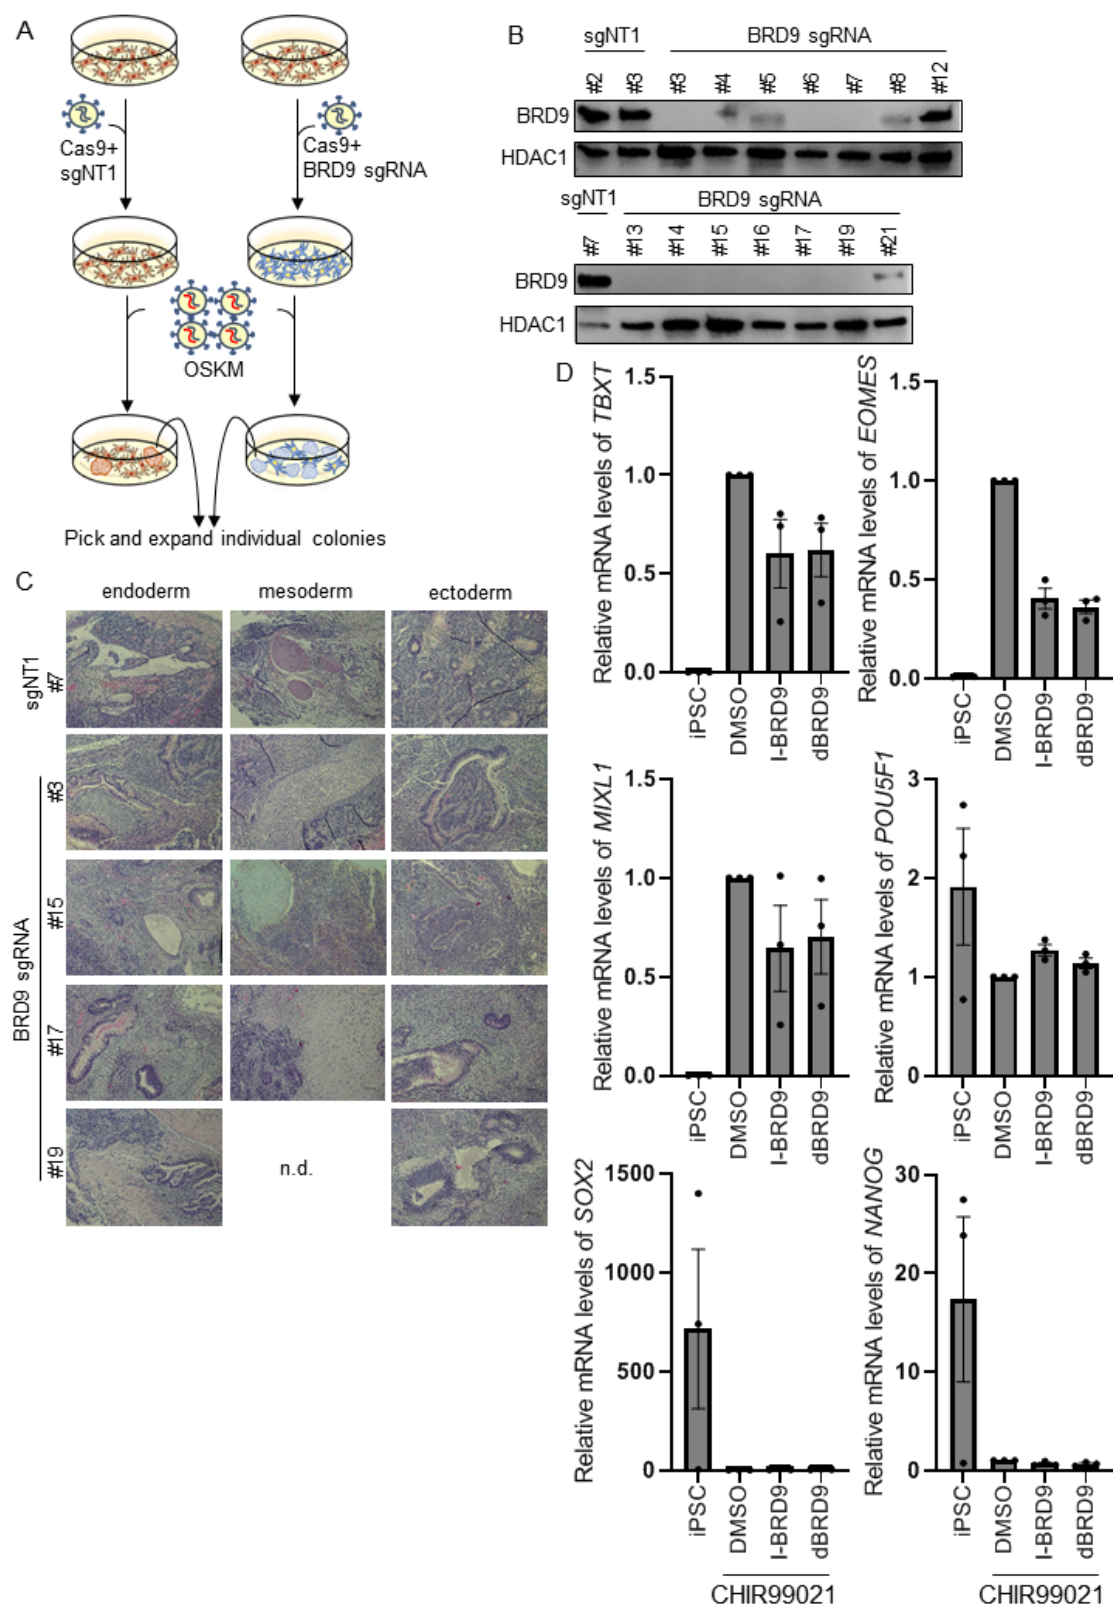

756

757 **Figure 4. BRD9 is dispensable for human pluripotency induction and maintenance but**  
758 **required for mesendoderm differentiation. (A)** Schematic for generation of BRD9 knockout  
759 and control iPSC lines **(B)** Western blot for BRD9 from iPSC clones generated from either  
760 sgNT1 or BRD9 sg823-expressing fibroblasts. HDAC1 serves as loading control. **(C)**  
761 Hematoxylin and eosin-stained sections of teratomas of iPSCs derived from sgNT1- or BRD9  
762 sg823-expressing fibroblasts show tissues from endoderm, ectoderm and mesoderm lineages.  
763 n.d.: not detected. **(D)** RT-qPCR results for mRNA levels of *TBXT*, *EOMES*, *MIXL1*, *POU5F1*,  
764 *SOX2* and *NANOG* genes normalized to *ACTB* mRNA levels for indicated treatments. n=3,  
765 biological replicates. p-values are calculated by one sample t-test for  $\mu=1$ . Exact p-values of I-  
766 BRD9 and dBRD9 treatments for *TBXT* expression are 0.1474 and 0.1069, respectively. Exact p-  
767 values of I-BRD9 and dBRD9 treatments for *EOMES* expression are 0.0076 and 0.0029,  
768 respectively. Exact p-values of I-BRD9 and dBRD9 treatments for *MIXL1* expression are 0.2429  
769 and 0.2541, respectively. Exact p-values of I-BRD9 and dBRD9 treatments for *POU5F1*  
770 expression are 0.0436 and 0.1172, respectively. Exact p-values of I-BRD9 and dBRD9  
771 treatments for *SOX2* expression are 0.2104 and 0.0590, respectively. Exact p-values of I-BRD9  
772 and dBRD9 treatments for *NANOG* expression are 0.1376 and 0.0852, respectively.  
773

774 **Figure 5**

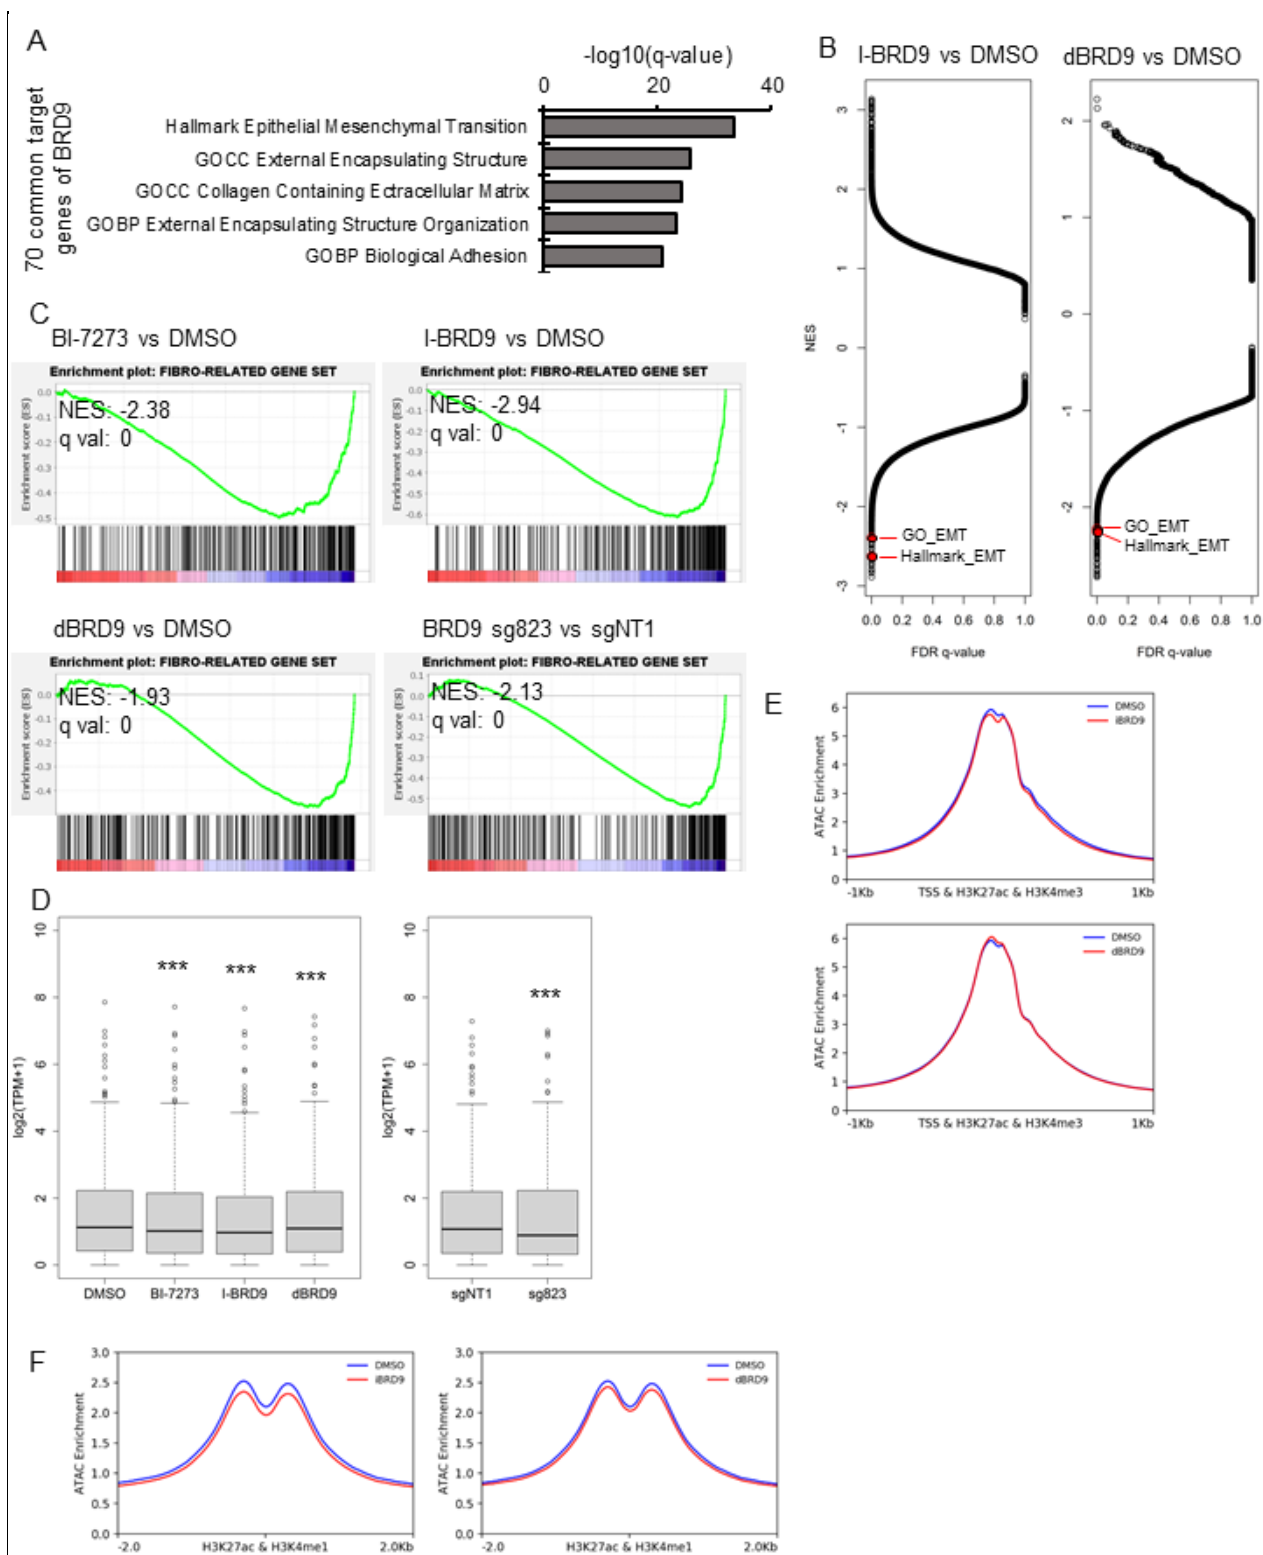

775



776 **Figure 5. BRD9 maintains fibroblast-specific gene expression and enhancer accessibility.**  
777 **(A)** Top five GO and Hallmark gene sets enriched in common downregulated genes upon  
778 dBRD9, BI-7273 and I-BRD9 treatments. Number of genes (n) in comparison were 70. p-values  
779 were calculated by hypergeometric distribution. **(B)** Gene set enrichment analysis on pre-ranked  
780 gene lists according to log<sub>2</sub>FC value for comparisons of fibroblasts treated with I-BRD9 and  
781 DMSO (left) and dBRD9 and DMSO (right) for all genesets available at The Molecular  
782 Signatures Database (MSigDB). Red circles indicate Hallmark\_EMT and GO\_EMT gene sets.  
783 **(C)** Gene set enrichment analysis (GSEA) of transcriptome data with indicated treatments for the  
784 fibroblast-related gene set. NES: normalized enrichment score, q val: False discovery rate (FDR)  
785 q-value. **(D)** Average expression levels of the 307 genes in fibroblast-related gene set across  
786 indicated fibroblasts. Whiskers indicate 95% confidence interval. p-values were calculated by  
787 Wilcoxon signed-rank test. \*\*\* denotes p<0.005, exact p-values from left to right are: 2.2e-16,  
788 2.2e-16, 3.8e-10 and 5.057e-05. **(E)** Aggregate ATAC-seq plots from fibroblasts treated with I-  
789 BRD9 (top), dBRD9 (bottom) and DMSO on the +/-1kb of transcription start site, H3K27ac and  
790 H3K4me3 summit. n=3, three biological replicates. **(F)** Aggregate ATAC-seq plots from  
791 fibroblasts treated with I-BRD9 (left), dBRD9 (right) and DMSO around +/-2kb of H3K27ac and  
792 H3K4me1 summit. n=3, three biological replicates.  
793

794 **Figure 6.**

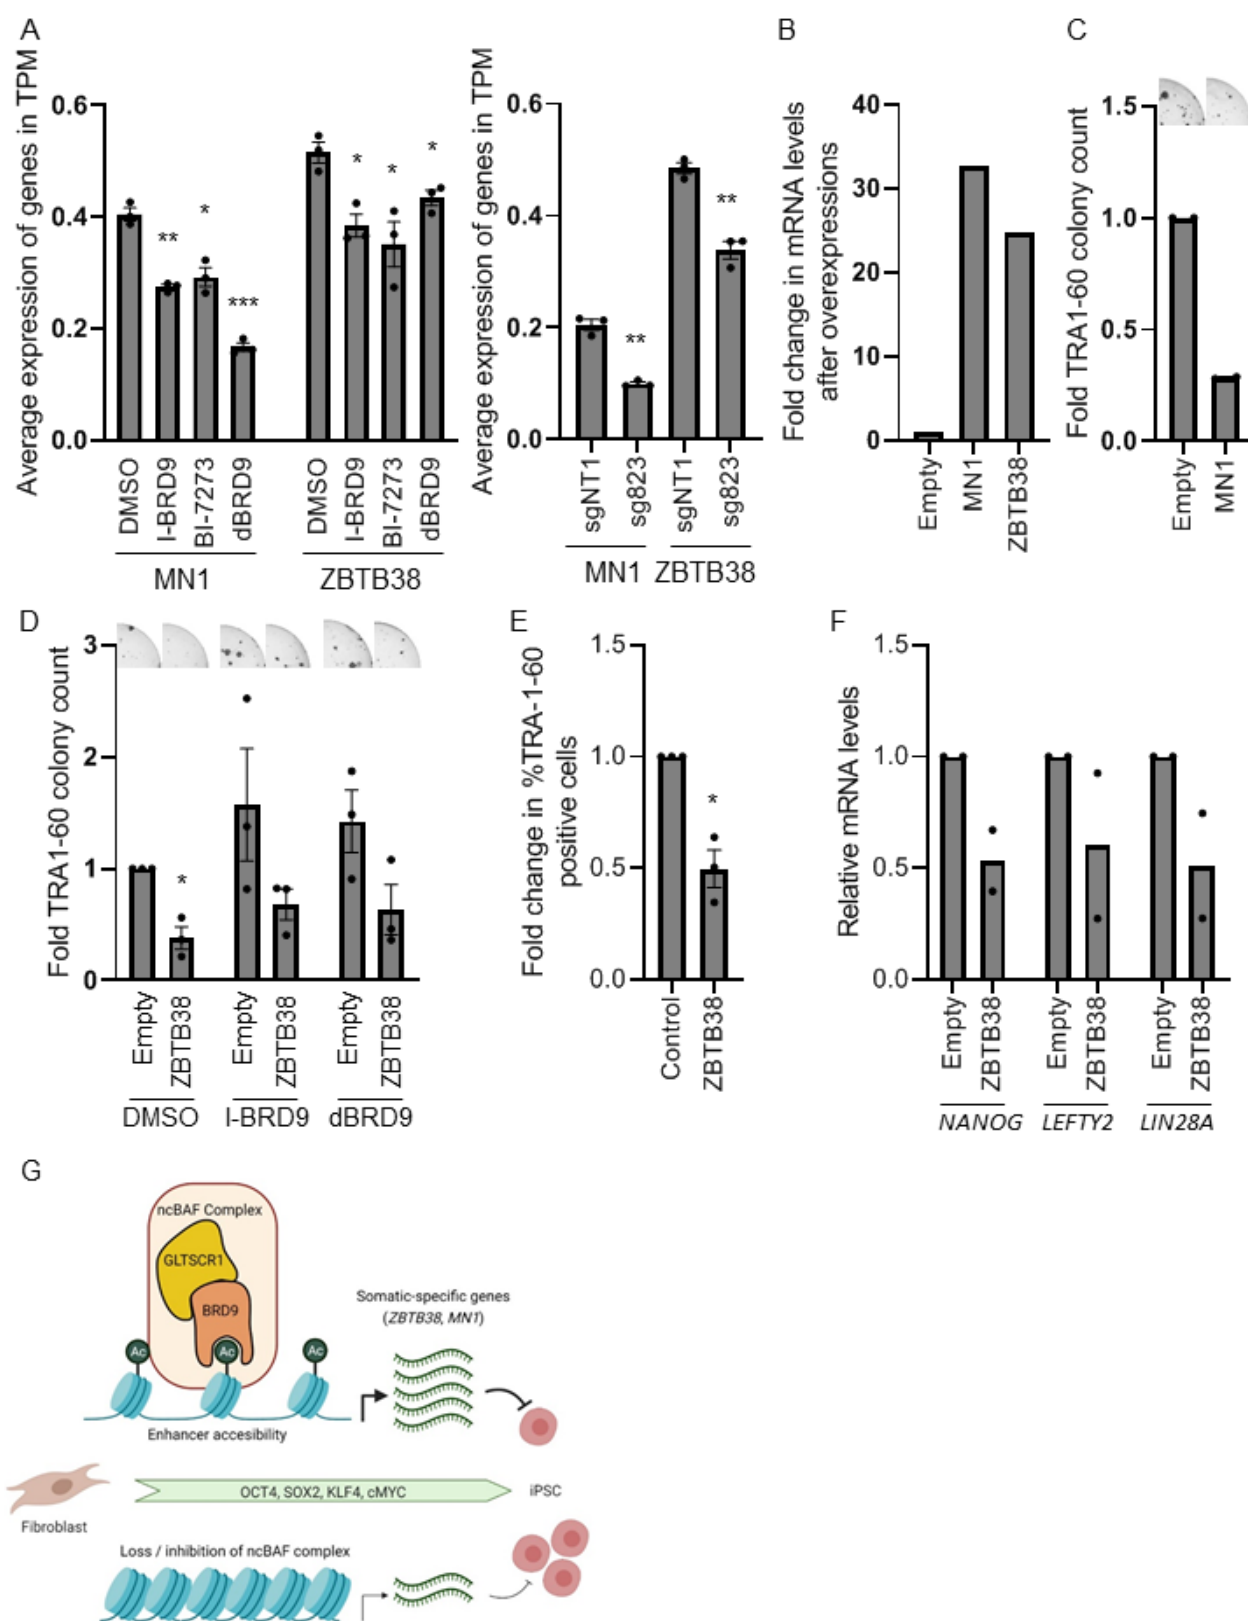



796

797 **Figure 6. BRD9-regulated MN1 and ZBTB38 act as barrier to reprogramming.** (A) Average  
798 expression of *MN1* and *ZBTB38* in TPM across indicated fibroblasts. n=3, biological replicates.  
799 p-values were calculated by two sample t-test. \* denotes p<0.05, \*\* denotes p<0.005, \*\*\*  
800 denotes p<0.0005. Exact p-values for small molecule treatments compared to DMSO control  
801 from left to right are: 0.0031, 0.0076 and 0.0002 for *MN1* and 0.0089, 0.0378 and 0.0284 for  
802 *ZBTB38*. Exact p-value of BRD9 gRNA expressing cells to control cells is 0.0045 for *MN1* and  
803 0.0026 for *ZBTB38*. (B) Fold change in relative *MN1* and *ZBTB38* mRNA levels upon their  
804 overexpression in fibroblasts compared empty vector controls (C) Fold change in the number of  
805 TRA-1-60-positive colonies upon *MN1* overexpression. Representative well images are above  
806 the graph. Bar graphs show the mean. n=2, independent biological replicates. (D) Fold change in  
807 the number of TRA-1-60-positive colonies upon *ZBTB38* overexpression and indicated  
808 treatments. Representative well images are above the graph. Bar graphs show the mean and error  
809 bars represent standard error of mean. n=3, independent biological replicates. p-values are  
810 calculated by one sample t-test for  $\mu=1$ . \* denotes p<0.05, exact p-value is 0.0255. (E) Fold  
811 change in the percentage of TRA-1-60-positive cells on day 6 of reprogramming by comparing  
812 *ZBTB38* expressing cells to control. Bar graphs show the mean and error bars represent standard  
813 error of mean. n=3, three biological replicates. p-values were calculated by two sample t-test. \*  
814 denotes p<0.05, exact p-value: 0.0272. (F) Fold change in relative mRNA levels for the *NANOG*,  
815 *LEFTY2* and *LIN28* genes on day 6 of reprogramming. Gene expression values were normalized  
816 to those observed in empty vector expressing fibroblasts. Bar graphs show the mean and dots  
817 indicate two biological replicates. (G) Model for BRD9-containing BAF complex's role in  
818 maintaining somatic cell identity during reprogramming.  
819
